# Supplementary material for: Bilayered lanthanide squarate hydrates (Ln = Eu to Lu) and magnetization reversal barriers of 21 K for Ln = Tm and 57 K for Yb
Source: Royal Society of Chemistry journal article supplement (doi:10.1039/d2dt03878a), 2023-01-01
Supplement: d2dt03878a1.pdf [file d2dt03878a1.pdf]

Supporting Information For:

**Bilayered lanthanide squarate hydrates (Ln = Eu to Lu) and  
magnetization reversal barriers 21 K for Ln = Tm and 57 K for Yb**

Rina Takano,<sup>a</sup> Koki Masuda,<sup>b</sup> Keigo Cho,<sup>b</sup> Yasutaka Kitagawa<sup>b</sup> and Takayuki Ishida<sup>\*a</sup>

<sup>a</sup> Department of Engineering Science, The University of Electro-Communications, Chofu, Tokyo 182-8585, Japan

<sup>b</sup> Graduate School of Engineering Science, Osaka University, Toyonaka, Osaka 560-8531, Japan

\*e-mail address: takayuki.ishida@uec.ac.jp

| Contents                                                                                                                        | Page         |
|---------------------------------------------------------------------------------------------------------------------------------|--------------|
| <b>Table S1.</b> Selected crystallographic data of <b>Eu-sq – Lu-sq</b>                                                         | p. S3 – S4   |
| <b>Table S2.</b> Selected geometric data of <b>Eu-sq – Lu-sq</b>                                                                | p. S5 – S7   |
| <b>Table S3.</b> CShMs of the coordination structures of <b>Eu-sq – Lu-sq</b>                                                   | p. S8        |
| <b>Table S4.</b> Geometry for the basal planes in <b>Yb-sq</b>                                                                  | p. S9 – S10  |
| <b>Figure S1.</b> Simulation of the $\chi_m T$ vs $T$ plot for <b>Gd-sq</b>                                                     | p. S11       |
| <b>Figure S2.</b> AC magnetic susceptibilities as a function of temperature for <b>Tb-sq – Yb-sq</b>                            | p. S12 – S13 |
| <b>Figure S3.</b> AC magnetic susceptibilities as a function of DC bias field for <b>Tb-sq, Dy-sq, Er-sq, Tm-sq, and Yb-sq</b>  | p. S14       |
| <b>Figure S4.</b> AC magnetic susceptibilities as a function of frequency for <b>Tb-sq, Dy-sq, Er-sq, Tm-sq, and Yb-sq</b>      | p. S15       |
| <b>Table S5.</b> Parameters for the generalized Debye model analysis for <b>Tb-sq, Dy-sq, Er-sq, Tm-sq, and Yb-sq</b>           | p. S16 – S18 |
| <b>Figure S5.</b> Cole-Cole plots for <b>Tb-sq, Dy-sq, Er-sq, Tm-sq, and Yb-sq</b>                                              | p. S19       |
| <b>Figure S6.</b> Arrhenius plots for <b>Tb-sq, Dy-sq, Er-sq, Tm-sq, and Yb-sq</b>                                              | p. S20       |
| <b>Figure S7.</b> PXRD for 1% diluted samples <b>Tb/Lu-sq, Dy/Lu-sq, Tm/Lu-sq, and Yb/Lu-sq</b>                                 | p. S21       |
| <b>Figure S8.</b> AC magnetic susceptibilities as a function of frequency for <b>Tb/Lu-sq, Dy/Lu-sq, Tm/Lu-sq, and Yb/Lu-sq</b> | p. S22       |
| <b>Table S6.</b> Parameters for the generalized Debye model analysis for <b>Tb/Lu-sq, Dy/Lu-sq, Tm/Lu-sq, and Yb/Lu-sq</b>      | p. S23       |
| <b>Figure S9.</b> Cole-Cole plots for <b>Tb/Lu-sq, Dy/Lu-sq, Tm/Lu-sq, and Yb/Lu-sq</b>                                         | p. S24       |

|                    |                                                                           |              |
|--------------------|---------------------------------------------------------------------------|--------------|
| <b>Figure S10.</b> | Arrhenius plots for <b>Tm/Lu-sq</b> and <b>Yb/Lu-sq</b>                   | p. S24       |
| <b>Figure S11.</b> | Correlation between $U_{\text{eff}}$ and CShM (SAPR)                      | p. S25       |
| <b>Table S7.</b>   | Cartesian coordinates used for CASSCF/NEVPT2 calculations                 | p. S26-S27   |
| <b>Table S8.</b>   | Calculated excitation energies of each $m_J$ state                        | p. S28-S29   |
| <b>Table S9.</b>   | Calculated $g$ -values for each Kramers Doublet                           | p. S30       |
| <b>Figure S12.</b> | Orbitals used for CASSCF/NEVPT2 calculation of the Tm<br>and Yb complexes | p. S31 – S33 |
| <b>References</b>  |                                                                           | p. S34       |

**Table S1.** Selected crystallographic data of **Eu-sq – Lu-sq**.

| Compound                                                                  | <b>Eu-sq</b>                                                    | <b>Gd-sq</b>                                                    | <b>Tb-sq</b> <sup>S1</sup>                                      | <b>Dy-sq</b>                                                    | <b>Ho-sq</b>                                                    |
|---------------------------------------------------------------------------|-----------------------------------------------------------------|-----------------------------------------------------------------|-----------------------------------------------------------------|-----------------------------------------------------------------|-----------------------------------------------------------------|
| Chemical formula                                                          | C <sub>12</sub> H <sub>16</sub> Eu <sub>2</sub> O <sub>20</sub> | C <sub>12</sub> H <sub>16</sub> Gd <sub>2</sub> O <sub>20</sub> | C <sub>12</sub> H <sub>16</sub> O <sub>20</sub> Tb <sub>2</sub> | C <sub>12</sub> H <sub>16</sub> Dy <sub>2</sub> O <sub>20</sub> | C <sub>12</sub> H <sub>16</sub> Ho <sub>2</sub> O <sub>20</sub> |
| Formula weight                                                            | 784.17                                                          | 794.75                                                          | 798.09                                                          | 805.25                                                          | 810.11                                                          |
| Crystal system                                                            | Monoclinic                                                      | Monoclinic                                                      | Monoclinic                                                      | Monoclinic                                                      | Monoclinic                                                      |
| Space group                                                               | <i>Pc</i>                                                       | <i>Pc</i>                                                       | <i>Pc</i>                                                       | <i>Pc</i>                                                       | <i>Pc</i>                                                       |
| <i>a</i> / Å                                                              | 11.9363(9)                                                      | 11.9359(7)                                                      | 11.9331(8)                                                      | 11.9063(8)                                                      | 11.9195(7)                                                      |
| <i>b</i> / Å                                                              | 8.2215(5)                                                       | 8.1994(4)                                                       | 8.1820(6)                                                       | 8.1711(5)                                                       | 8.1486(5)                                                       |
| <i>c</i> / Å                                                              | 10.1229(7)                                                      | 10.0894(5)                                                      | 10.0563(7)                                                      | 10.0452(6)                                                      | 10.0126(6)                                                      |
| $\beta$ / deg                                                             | 96.017(7)                                                       | 95.928(5)                                                       | 96.103(6)                                                       | 95.934(6)                                                       | 95.907(6)                                                       |
| <i>V</i> / Å <sup>3</sup>                                                 | 987.93(12)                                                      | 982.14(9)                                                       | 976.29(11)                                                      | 972.04(11)                                                      | 967.33(10)                                                      |
| <i>Z</i>                                                                  | 2                                                               | 2                                                               | 2                                                               | 2                                                               | 2                                                               |
| <i>d</i> / g cm <sup>-3</sup>                                             | 2.636                                                           | 2.687                                                           | 2.715                                                           | 2.751                                                           | 2.781                                                           |
| $\mu$ / mm <sup>-1</sup>                                                  | 6.397                                                           | 6.801                                                           | 7.292                                                           | 7.736                                                           | 8.228                                                           |
| No. of unique refls.                                                      | 3858                                                            | 3976                                                            | 4200                                                            | 3920                                                            | 3550                                                            |
| <i>R</i> <sub>int</sub>                                                   | 0.0279                                                          | 0.0307                                                          | 0.0261                                                          | 0.0345                                                          | 0.0233                                                          |
| <i>R</i> ( <i>F</i> ) ( <i>I</i> > 2 $\sigma$ ( <i>I</i> )) <sup>a)</sup> | 0.0377                                                          | 0.0234                                                          | 0.0247                                                          | 0.0305                                                          | 0.0195                                                          |
| <i>R</i> <sub>w</sub> ( <i>F</i> <sup>2</sup> ) (all data) <sup>b)</sup>  | 0.1112                                                          | 0.0565                                                          | 0.0603                                                          | 0.0848                                                          | 0.0496                                                          |
| GOF ( <i>S</i> )                                                          | 1.059                                                           | 1.035                                                           | 1.020                                                           | 1.025                                                           | 1.007                                                           |
| $\Delta\rho_{\max}, \Delta\rho_{\min}$ / e Å <sup>-3</sup>                | 1.489, -0.600                                                   | 0.700, -0.752                                                   | 0.597, -0.642                                                   | 1.362, -1.237                                                   | 0.743, -0.835                                                   |
| <i>T</i> / K                                                              | 296                                                             | 295                                                             | 296                                                             | 296                                                             | 295                                                             |
| CCDC                                                                      | 2218673                                                         | 2218674                                                         | 2108278                                                         | 2218675                                                         | 2218676                                                         |

a)  $R(F) = \sum ||F_o| - |F_c|| / \sum |F_o|$

b)  $R_w(F^2) = \{ \sum (w(F_o^2 - F_c^2)^2) / \sum w(F_o^2)^2 \}^{1/2}$

**Table S1.** (Continued) Selected crystallographic data of **Eu-sq** – **Lu-sq**.

| Compound                                                                  | <b>Er-sq</b>                                                    | <b>Tm-sq</b>                                                    | <b>Yb-sq</b>                                                    | <b>Lu-sq</b>                                                    |
|---------------------------------------------------------------------------|-----------------------------------------------------------------|-----------------------------------------------------------------|-----------------------------------------------------------------|-----------------------------------------------------------------|
| Chemical formula                                                          | C <sub>12</sub> H <sub>16</sub> Er <sub>2</sub> O <sub>20</sub> | C <sub>12</sub> H <sub>16</sub> O <sub>20</sub> Tm <sub>2</sub> | C <sub>12</sub> H <sub>16</sub> O <sub>20</sub> Yb <sub>2</sub> | C <sub>12</sub> H <sub>16</sub> Lu <sub>2</sub> O <sub>20</sub> |
| Formula weight                                                            | 814.77                                                          | 818.12                                                          | 826.33                                                          | 830.19                                                          |
| Crystal system                                                            | Monoclinic                                                      | Monoclinic                                                      | Monoclinic                                                      | Monoclinic                                                      |
| Space group                                                               | <i>Pc</i>                                                       | <i>Pc</i>                                                       | <i>Pc</i>                                                       | <i>Pc</i>                                                       |
| <i>a</i> / Å                                                              | 11.9232(4)                                                      | 11.9240(4)                                                      | 11.9168(4)                                                      | 11.9151(5)                                                      |
| <i>b</i> / Å                                                              | 8.1407(2)                                                       | 8.1318(2)                                                       | 8.1217(2)                                                       | 8.1066(3)                                                       |
| <i>c</i> / Å                                                              | 10.0025(3)                                                      | 9.9899(4)                                                       | 9.9844(3)                                                       | 9.9577(4)                                                       |
| $\beta$ / deg                                                             | 95.988(3)                                                       | 95.876(3)                                                       | 95.823(3)                                                       | 95.748(4)                                                       |
| <i>V</i> / Å <sup>3</sup>                                                 | 965.59(5)                                                       | 963.56(6)                                                       | 961.35(5)                                                       | 956.99(7)                                                       |
| <i>Z</i>                                                                  | 2                                                               | 2                                                               | 2                                                               | 2                                                               |
| <i>d</i> / g cm <sup>-3</sup>                                             | 2.802                                                           | 2.820                                                           | 2.855                                                           | 2.881                                                           |
| $\mu$ / mm <sup>-1</sup>                                                  | 8.740                                                           | 9.257                                                           | 9.777                                                           | 10.365                                                          |
| No. of unique refls.                                                      | 3455                                                            | 3610                                                            | 4622                                                            | 4006                                                            |
| <i>R</i> <sub>int</sub>                                                   | 0.0218                                                          | 0.0133                                                          | 0.0317                                                          | 0.0231                                                          |
| <i>R</i> ( <i>F</i> ) ( <i>I</i> > 2 $\sigma$ ( <i>I</i> )) <sup>a)</sup> | 0.0215                                                          | 0.0182                                                          | 0.0230                                                          | 0.0281                                                          |
| <i>R</i> <sub>w</sub> ( <i>F</i> <sup>2</sup> ) (all data) <sup>b)</sup>  | 0.0537                                                          | 0.0546                                                          | 0.0607                                                          | 0.0847                                                          |
| GOF ( <i>S</i> )                                                          | 1.055                                                           | 1.062                                                           | 1.036                                                           | 1.016                                                           |
| $\Delta\rho_{\max}, \Delta\rho_{\min}$ / e Å <sup>-3</sup>                | 0.677, -0.796                                                   | 0.873, -1.334                                                   | 0.885, -1.251                                                   | 1.052, -1.277                                                   |
| <i>T</i> / K                                                              | 298                                                             | 296                                                             | 298                                                             | 298                                                             |
| CCDC                                                                      | 2218677                                                         | 2218678                                                         | 2218679                                                         | 2218680                                                         |

a)  $R(F) = \Sigma||F_o| - |F_c||/|F_o|$

b)  $R_w(F^2) = \{\Sigma(w(F_o^2 - F_c^2)^2)/\Sigma w(F_o^2)^2\}^{1/2}$



**Table S2.** Selected geometric data of **Eu-sq – Lu-sq**.

| Compound                 | Eu-sq    | Gd-sq    | Tb-sq <sup>S1</sup> | Dy-sq    | Ho-sq    | Er-sq    | Tm-sq    | Yb-sq    | Lu-sq    |
|--------------------------|----------|----------|---------------------|----------|----------|----------|----------|----------|----------|
| Distance, $d / \text{Å}$ |          |          |                     |          |          |          |          |          |          |
| RE1-O1                   | 2.39(1)  | 2.379(3) | 2.375(7)            | 2.356(8) | 2.348(5) | 2.343(6) | 2.337(3) | 2.336(6) | 2.324(8) |
| RE1-O3                   | 2.43(1)  | 2.422(4) | 2.420(7)            | 2.404(8) | 2.396(5) | 2.399(6) | 2.392(3) | 2.381(6) | 2.376(8) |
| RE1-O4                   | 2.46(1)  | 2.441(3) | 2.438(8)            | 2.43(1)  | 2.409(6) | 2.406(7) | 2.400(3) | 2.396(7) | 2.410(9) |
| RE1-O5                   | 2.40(1)  | 2.422(4) | 2.417(9)            | 2.40(1)  | 2.398(6) | 2.394(7) | 2.382(4) | 2.373(7) | 2.37(1)  |
| RE1-O13                  | 2.40(1)  | 2.394(4) | 2.379(6)            | 2.362(9) | 2.354(5) | 2.337(6) | 2.334(3) | 2.331(5) | 2.301(8) |
| RE1-O14                  | 2.43(1)  | 2.405(3) | 2.39(1)             | 2.39(1)  | 2.369(7) | 2.364(8) | 2.339(3) | 2.334(8) | 2.30(1)  |
| RE1-O15                  | 2.39(1)  | 2.352(4) | 2.343(9)            | 2.33(1)  | 2.295(6) | 2.291(7) | 2.283(4) | 2.280(7) | 2.27(1)  |
| RE1-O16                  | 2.39(1)  | 2.367(4) | 2.336(7)            | 2.332(8) | 2.314(5) | 2.309(6) | 2.293(3) | 2.287(6) | 2.276(8) |
| RE2-O8                   | 2.35(1)  | 2.321(4) | 2.310(7)            | 2.295(8) | 2.293(5) | 2.280(6) | 2.271(3) | 2.259(5) | 2.255(8) |
| RE2-O9                   | 2.479(9) | 2.459(4) | 2.449(7)            | 2.451(8) | 2.426(5) | 2.416(6) | 2.419(3) | 2.420(5) | 2.406(7) |
| RE2-O10                  | 2.43(1)  | 2.431(3) | 2.418(7)            | 2.411(9) | 2.402(5) | 2.415(6) | 2.397(3) | 2.395(6) | 2.370(9) |
| RE2-O11                  | 2.41(1)  | 2.400(4) | 2.389(7)            | 2.384(9) | 2.368(5) | 2.369(6) | 2.354(3) | 2.349(5) | 2.353(7) |
| RE2-O17                  | 2.45(1)  | 2.423(3) | 2.41(1)             | 2.40(1)  | 2.383(7) | 2.364(8) | 2.363(3) | 2.358(8) | 2.36(1)  |
| RE2-O18                  | 2.42(1)  | 2.386(4) | 2.385(9)            | 2.38(1)  | 2.351(7) | 2.343(7) | 2.337(4) | 2.327(7) | 2.32(1)  |
| RE2-O19                  | 2.38(1)  | 2.389(4) | 2.387(7)            | 2.350(9) | 2.345(5) | 2.340(7) | 2.327(3) | 2.315(6) | 2.297(8) |
| RE2-O20                  | 2.34(1)  | 2.357(4) | 2.331(9)            | 2.32(1)  | 2.328(6) | 2.327(7) | 2.302(4) | 2.289(7) | 2.28(1)  |
| C1-O1                    | 1.26(2)  | 1.243(7) | 1.25(1)             | 1.27(1)  | 1.245(8) | 1.25(1)  | 1.260(6) | 1.254(9) | 1.25(1)  |
| C2-O2                    | 1.25(2)  | 1.247(7) | 1.26(1)             | 1.25(2)  | 1.24(1)  | 1.25(1)  | 1.246(6) | 1.25(1)  | 1.26(2)  |
| C3-O3                    | 1.26(2)  | 1.263(7) | 1.25(1)             | 1.26(1)  | 1.263(8) | 1.27(1)  | 1.274(6) | 1.27(1)  | 1.25(1)  |
| C4-O4                    | 1.26(2)  | 1.264(7) | 1.27(1)             | 1.28(2)  | 1.25(1)  | 1.27(1)  | 1.272(6) | 1.29(1)  | 1.26(2)  |
| C5-O5                    | 1.28(1)  | 1.273(6) | 1.27(1)             | 1.28(1)  | 1.272(7) | 1.273(9) | 1.278(5) | 1.274(8) | 1.29(1)  |
| C6-O6                    | 1.19(2)  | 1.228(6) | 1.23(1)             | 1.23(1)  | 1.236(9) | 1.25(1)  | 1.234(6) | 1.25(1)  | 1.24(1)  |
| C7-O7                    | 1.23(2)  | 1.267(6) | 1.25(1)             | 1.26(1)  | 1.255(7) | 1.27(1)  | 1.258(6) | 1.242(9) | 1.27(1)  |
| C8-O8                    | 1.27(2)  | 1.247(6) | 1.25(1)             | 1.25(1)  | 1.241(8) | 1.26(1)  | 1.252(5) | 1.247(9) | 1.23(1)  |
| C9-O9                    | 1.25(2)  | 1.263(7) | 1.26(1)             | 1.26(1)  | 1.261(8) | 1.26(1)  | 1.255(6) | 1.252(9) | 1.26(1)  |
| C10-O10                  | 1.28(2)  | 1.257(7) | 1.25(1)             | 1.24(2)  | 1.27(1)  | 1.25(1)  | 1.252(6) | 1.25(1)  | 1.26(1)  |
| C11-O11                  | 1.23(2)  | 1.248(7) | 1.23(1)             | 1.22(1)  | 1.248(8) | 1.24(1)  | 1.244(6) | 1.241(9) | 1.24(1)  |
| C12-O12                  | 1.24(2)  | 1.233(7) | 1.25(1)             | 1.23(2)  | 1.26(1)  | 1.26(1)  | 1.256(6) | 1.25(1)  | 1.25(2)  |
| C1-C2                    | 1.47(2)  | 1.467(9) | 1.46(1)             | 1.46(1)  | 1.48(1)  | 1.46(1)  | 1.485(7) | 1.48(1)  | 1.48(1)  |
| C2-C3                    | 1.44(2)  | 1.451(8) | 1.44(2)             | 1.44(2)  | 1.47(1)  | 1.47(1)  | 1.454(7) | 1.45(1)  | 1.46(2)  |
| C3-C4                    | 1.45(2)  | 1.453(9) | 1.46(1)             | 1.46(1)  | 1.45(1)  | 1.44(1)  | 1.450(7) | 1.45(1)  | 1.46(1)  |
| C4-C1                    | 1.46(2)  | 1.473(8) | 1.45(2)             | 1.45(2)  | 1.49(1)  | 1.46(1)  | 1.453(7) | 1.45(1)  | 1.47(2)  |
| C5-C6                    | 1.48(2)  | 1.462(6) | 1.46(1)             | 1.46(1)  | 1.455(8) | 1.45(1)  | 1.450(6) | 1.453(9) | 1.45(1)  |
| C6-C7                    | 1.52(2)  | 1.463(7) | 1.47(1)             | 1.47(1)  | 1.47(1)  | 1.46(1)  | 1.476(7) | 1.47(1)  | 1.46(2)  |
| C7-C8                    | 1.45(2)  | 1.448(6) | 1.47(1)             | 1.47(1)  | 1.464(8) | 1.45(1)  | 1.473(6) | 1.466(9) | 1.46(1)  |
| C8-C5                    | 1.47(2)  | 1.465(7) | 1.45(1)             | 1.45(1)  | 1.462(9) | 1.45(1)  | 1.454(6) | 1.466(9) | 1.46(1)  |
| C9-C10                   | 1.45(2)  | 1.460(9) | 1.46(1)             | 1.46(1)  | 1.46(1)  | 1.47(1)  | 1.470(7) | 1.47(1)  | 1.47(1)  |
| C10-C11                  | 1.46(2)  | 1.456(8) | 1.49(2)             | 1.49(2)  | 1.45(1)  | 1.49(1)  | 1.490(7) | 1.49(1)  | 1.48(2)  |
| C11-C12                  | 1.45(2)  | 1.473(9) | 1.46(1)             | 1.46(1)  | 1.46(1)  | 1.47(1)  | 1.462(7) | 1.47(1)  | 1.47(2)  |
| C12-C9                   | 1.48(2)  | 1.473(8) | 1.47(2)             | 1.47(2)  | 1.45(1)  | 1.45(2)  | 1.474(7) | 1.48(1)  | 1.48(2)  |

| Compound                | Eu-sq   | Gd-sq   | Tb-sq <sup>S1</sup> | Dy-sq   | Ho-sq   | Er-sq   | Tm-sq   | Yb-sq   | Lu-sq   |
|-------------------------|---------|---------|---------------------|---------|---------|---------|---------|---------|---------|
| angle $\theta / ^\circ$ |         |         |                     |         |         |         |         |         |         |
| C2-C1-C4                | 89(1)   | 89.0(5) | 89.2(8)             | 88(1)   | 88.9(6) | 89.9(8) | 89.3(4) | 89.1(7) | 88.6(9) |
| C1-C2-C3                | 90(1)   | 89.7(5) | 89.5(9)             | 90(1)   | 89.7(6) | 89.3(8) | 89.1(4) | 89.8(7) | 89.5(9) |
| C2-C3-C4                | 89(1)   | 89.6(5) | 89.7(8)             | 90(1)   | 89.0(6) | 89.8(8) | 89.3(4) | 89.9(7) | 89.8(9) |
| C1-C4-C3                | 90(1)   | 90.0(5) | 89.7(8)             | 89(1)   | 90.0(6) | 89.8(8) | 89.5(4) | 89.1(6) | 89.4(9) |
| C6-C5-C8                | 89(1)   | 89.1(4) | 88.8(6)             | 89.0(7) | 88.7(5) | 89.4(6) | 88.1(3) | 89.4(5) | 88.2(7) |
| C5-C6-C7                | 87(1)   | 88.4(4) | 88.9(6)             | 88.2(8) | 88.7(5) | 88.7(6) | 88.7(4) | 89.6(5) | 88.5(8) |
| C6-C7-C8                | 90(1)   | 88.5(4) | 89.8(6)             | 89.4(8) | 89.3(5) | 89.4(6) | 89.9(4) | 89.8(5) | 88.9(8) |
| C5-C8-C7                | 89.7(9) | 88.8(4) | 89.1(6)             | 89.6(7) | 88.6(4) | 89.4(6) | 88.6(3) | 89.4(5) | 87.9(7) |
| C10-C9-C12              | 89(1)   | 89.8(4) | 89.8(9)             | 89(1)   | 89.0(6) | 89.6(8) | 89.9(4) | 89.8(7) | 90.0(9) |
| C9-C10-C11              | 89(1)   | 89.3(5) | 89.7(8)             | 89(1)   | 89.1(6) | 89.7(8) | 89.7(4) | 89.9(6) | 89.8(8) |
| C10-C11-C12             | 90(1)   | 89.9(4) | 89.5(8)             | 89(1)   | 89.2(6) | 88.9(8) | 89.6(4) | 89.3(6) | 89.9(9) |
| C9-C12-C11              | 90(1)   | 89.5(4) | 89.6(9)             | 90(1)   | 89.4(6) | 89.1(8) | 89.4(4) | 89.7(7) | 89.9(9) |
| torsion $\phi / ^\circ$ |         |         |                     |         |         |         |         |         |         |
| O1-C1-C2-O2             | 9(3)    | -8(1)   | 7(2)                | -3(3)   | 6(2)    | -4.9(8) | 7(1)    | -8(2)   | -6(2)   |
| O2-C2-C3-O3             | -10(4)  | 8(1)    | -9(2)               | 8(3)    | -6(2)   | 5.0(8)  | -6(1)   | 10(2)   | 8(3)    |
| O3-C3-C4-O4             | 9(4)    | -7(1)   | 6(2)                | -10(3)  | 7(2)    | -4.9(8) | 6(1)    | -9(2)   | -7(2)   |
| O4-C4-C1-O1             | 6(3)    | -7(1)   | 6(2)                | -6(3)   | 6(2)    | -5.0(8) | 8(1)    | -8(2)   | -6(2)   |
| O5-C5-C6-O6             | 8(3)    | -10(1)  | 8(2)                | -10(2)  | 9(1)    | -6.2(6) | 9.9(9)  | -11(1)  | -11(2)  |
| O6-C6-C7-O7             | -9(3)   | 11(1)   | -9(2)               | 11(2)   | -11(1)  | 6.2(6)  | -10(1)  | 12(2)   | 13(2)   |
| O7-C7-C8-O8             | 6(3)    | -8(1)   | 10(2)               | -7(2)   | 8(1)    | -6.2(6) | 9.0(9)  | -9(1)   | -10(2)  |
| O8-C8-C5-O5             | 6(3)    | -8(1)   | 9(2)                | -6(2)   | 6(1)    | -6.2(6) | 9.0(8)  | -8(1)   | -8(2)   |
| O9-C9-C10-O10           | -5(3)   | 6(1)    | -5(2)               | 4(3)    | -5(2)   | 3.1(8)  | -7(1)   | 5(2)    | 6(2)    |
| O10-C10-C11-O11         | 5(3)    | -7(1)   | 6(2)                | -7(3)   | 5(2)    | -3.1(8) | 6(1)    | -5(2)   | -7(2)   |
| O11-C11-C12-O12         | -3(3)   | 3(1)    | -4(2)               | 6(3)    | -4(2)   | 3.1(8)  | -2(1)   | 2(2)    | 5(2)    |
| O12-C12-C9-O9           | -4(3)   | 4(1)    | -3(2)               | 4(3)    | -5(2)   | 3.2(8)  | -4(1)   | 2(2)    | 4(2)    |
| C4-C1-C2-C3             | 3(1)    | -4.2(5) | 4.3(8)              | -4(1)   | 4.9(6)  | -7(2)   | 4.9(4)  | -4.1(7) | -4.8(9) |
| C1-C2-C3-C4             | -3(1)   | 4.3(5)  | -4.3(8)             | 4(1)    | -5.1(6) | 8(2)    | -4.9(4) | 4.0(7)  | 4.9(9)  |
| C2-C3-C4-C1             | 3(1)    | -4.2(5) | 4.3(8)              | -4(1)   | 5.0(6)  | -6(2)   | 5.0(4)  | -4.1(7) | -4.9(9) |
| C3-C4-C1-C2             | 3(1)    | -4.2(5) | 4.3(8)              | -4(1)   | 5.0(6)  | -6(2)   | 4.9(4)  | -4.1(7) | -4.8(9) |
| C8-C5-C6-C7             | 6(1)    | -5.3(4) | 5.7(6)              | -6.2(8) | 6.2(5)  | -9(2)   | 6.3(3)  | -6.1(5) | -5.9(7) |
| C5-C6-C7-C8             | -6(1)   | 5.4(4)  | -5.7(6)             | 6.3(8)  | -6.2(5) | 11(2)   | -6.2(3) | 6.1(5)  | 5.9(7)  |
| C6-C7-C8-C5             | 6(1)    | -5.4(4) | 5.7(6)              | -6.3(8) | 6.1(5)  | -10(2)  | 6.2(3)  | -6.1(5) | -5.8(7) |
| C7-C8-C5-C6             | 6(1)    | -5.4(4) | 5.7(6)              | -6.4(8) | 6.2(5)  | -8(2)   | 6.3(3)  | -6.1(5) | -5.9(7) |
| C12-C9-C10-C11          | -4(1)   | 3.1(4)  | -3.8(8)             | 3(1)    | -3.9(6) | 8(2)    | -4.1(4) | 5.0(6)  | 4.3(9)  |
| C9-C10-C11-C12          | 4(1)    | -3.1(4) | 3.8(8)              | -3(1)   | 3.9(6)  | -8(2)   | 4.1(4)  | -5.0(6) | -4.4(9) |
| C10-C11-C12-C9          | -4(1)   | 3.0(4)  | -3.8(8)             | 3(1)    | -3.9(6) | 4(2)    | -4.1(4) | 5.0(6)  | 4.4(9)  |
| C11-C12-C9-C10          | -4(1)   | 3.0(4)  | -3.9(9)             | 3(1)    | -3.9(6) | 4(2)    | -4.1(4) | 5.0(6)  | 4.4(9)  |

| Compound                                 | Eu-sq     | Gd-sq     | Tb-sq <sup>S1</sup> | Dy-sq     | Ho-sq     | Er-sq     | Tm-sq     | Yb-sq     | Lu-sq     |
|------------------------------------------|-----------|-----------|---------------------|-----------|-----------|-----------|-----------|-----------|-----------|
| Interatomic distance, $d / \text{\AA}^a$ |           |           |                     |           |           |           |           |           |           |
| RE1 - - - RE1 <sup>i</sup>               | 6.4701(6) | 6.4454(3) | 6.4246(5)           | 6.4190(5) | 6.3984(4) | 6.3923(3) | 6.3841(2) | 6.3785(3) | 6.3670(4) |
| RE1 - - - RE1 <sup>ii</sup>              | 6.5715(6) | 6.5563(3) | 6.5405(5)           | 6.5306(5) | 6.5117(4) | 6.5050(3) | 6.4978(2) | 6.4928(3) | 6.4739(4) |
| RE2 - - - RE2 <sup>iii</sup>             | 6.5039(6) | 6.4859(3) | 6.4671(5)           | 6.4595(5) | 6.4386(4) | 6.4306(3) | 6.4226(2) | 6.4177(3) | 6.4023(4) |
| RE2 - - - RE2 <sup>iv</sup>              | 6.5371(6) | 6.5151(3) | 6.4973(5)           | 6.4894(5) | 6.4709(4) | 6.4660(3) | 6.4586(2) | 6.4539(3) | 6.4381(4) |
| RE1 - - - RE2                            | 6.5620(8) | 6.5497(4) | 6.5479(6)           | 6.5229(7) | 6.5214(5) | 6.5203(4) | 6.5133(3) | 6.5059(4) | 6.4973(5) |
| RE1 - - - RE1 <sup>v</sup>               | 8.2215(5) | 8.1994(4) | 8.1820(6)           | 8.1711(5) | 8.1486(5) | 8.1407(2) | 8.1318(2) | 8.1217(2) | 8.1066(3) |
| RE2 - - - RE2 <sup>v</sup>               | 8.2215(5) | 8.1994(4) | 8.1820(6)           | 8.1711(5) | 8.1486(5) | 8.1407(2) | 8.1318(2) | 8.1217(2) | 8.1066(3) |

a) Symmetry operation codes of i,ii, iii, iv, and v are  $(x, 2-y, -1/2+z)$ ,  $(x, 1-y, -1/2+z)$ ,  $(x,1-y, 1/2+z)$ ,  $(x, 2-y, 1/2+z)$ , and  $(x, 1+y, z)$ , respectively.

**Table S3.** Continuous shape measures<sup>S2</sup> of the coordination structures in **Eu-sq** – **Lu-sq**.

|          |                 |                                            |
|----------|-----------------|--------------------------------------------|
| OP-8     | D <sub>8h</sub> | Octagon                                    |
| HPY-8    | C <sub>7v</sub> | Heptagonal pyramid                         |
| HBPY-8   | D <sub>6h</sub> | Hexagonal bipyramid                        |
| CU-8     | O <sub>h</sub>  | Cube                                       |
| SAPR-8   | D <sub>4d</sub> | Square antiprism                           |
| TDD-8    | D <sub>2d</sub> | Triangular dodecahedron                    |
| JGBF-8   | D <sub>2d</sub> | Johnson gyrobifastigium J26                |
| JETBPY-8 | D <sub>3h</sub> | Johnson elongated triangular bipyramid J14 |
| JBTPR-8  | C <sub>2v</sub> | Biaugmented trigonal prism J50             |
| BTPR-8   | C <sub>2v</sub> | Biaugmented trigonal prism                 |
| JSD-8    | D <sub>2d</sub> | Snub diphenooid J84                        |
| TT-8     | T <sub>d</sub>  | Triakis tetrahedron                        |
| ETBPY-8  | D <sub>3h</sub> | Elongated trigonal bipyramid               |

| Structure          | OP     | HPY    | HBPY   | CU    | SAPR  | TDD   | JGBF   | JETBPY | JBTPR | BTPR  | JSD   | TT     | ETBPY  |
|--------------------|--------|--------|--------|-------|-------|-------|--------|--------|-------|-------|-------|--------|--------|
| <b>Eu-sq</b> (Eu1) | 29.550 | 23.545 | 16.294 | 9.562 | 0.405 | 1.570 | 15.729 | 27.481 | 2.257 | 1.653 | 4.231 | 10.398 | 23.101 |
| <b>Eu-sq</b> (Eu2) | 28.642 | 23.246 | 17.009 | 9.619 | 0.294 | 1.619 | 15.769 | 27.814 | 2.320 | 1.874 | 4.009 | 10.378 | 23.771 |
| <b>Gd-sq</b> (Gd1) | 29.421 | 23.360 | 16.222 | 9.558 | 0.375 | 1.572 | 15.806 | 27.486 | 2.220 | 1.691 | 4.128 | 10.343 | 23.211 |
| <b>Gd-sq</b> (Gd2) | 28.681 | 23.114 | 17.142 | 9.749 | 0.290 | 1.633 | 15.737 | 27.886 | 2.322 | 1.831 | 4.057 | 10.543 | 23.844 |
| <b>Tb-sq</b> (Tb1) | 29.365 | 23.277 | 16.372 | 9.683 | 0.367 | 1.597 | 15.834 | 27.468 | 2.176 | 1.698 | 4.046 | 10.411 | 23.301 |
| <b>Tb-sq</b> (Tb2) | 28.502 | 23.193 | 17.194 | 9.808 | 0.292 | 1.617 | 15.621 | 27.727 | 2.273 | 1.791 | 3.990 | 10.590 | 23.683 |
| <b>Dy-sq</b> (Dy1) | 29.506 | 23.225 | 16.383 | 9.707 | 0.373 | 1.629 | 15.949 | 27.309 | 2.245 | 1.784 | 4.117 | 10.465 | 23.143 |
| <b>Dy-sq</b> (Dy2) | 28.723 | 23.215 | 17.095 | 9.723 | 0.329 | 1.565 | 15.465 | 27.713 | 2.204 | 1.755 | 3.863 | 10.450 | 23.785 |
| <b>Ho-sq</b> (Ho1) | 29.790 | 23.190 | 16.312 | 9.637 | 0.434 | 1.537 | 15.713 | 27.404 | 2.248 | 1.809 | 3.973 | 10.354 | 23.241 |
| <b>Ho-sq</b> (Ho2) | 28.696 | 23.101 | 17.155 | 9.890 | 0.325 | 1.560 | 15.531 | 27.638 | 2.225 | 1.730 | 3.913 | 10.687 | 23.676 |
| <b>Er-sq</b> (Er1) | 29.497 | 23.187 | 16.384 | 9.695 | 0.421 | 1.500 | 15.616 | 27.265 | 2.222 | 1.809 | 3.865 | 10.399 | 23.220 |
| <b>Er-sq</b> (Er2) | 28.915 | 23.119 | 17.111 | 9.891 | 0.337 | 1.579 | 15.483 | 27.809 | 2.240 | 1.763 | 3.894 | 10.655 | 23.898 |
| <b>Tm-sq</b> (Tm1) | 29.621 | 23.136 | 16.507 | 9.800 | 0.422 | 1.538 | 15.525 | 27.285 | 2.218 | 1.813 | 3.857 | 10.482 | 23.285 |
| <b>Tm-sq</b> (Tm2) | 28.835 | 23.166 | 17.159 | 9.841 | 0.329 | 1.582 | 15.590 | 27.621 | 2.198 | 1.736 | 3.885 | 10.598 | 23.733 |
| <b>Yb-sq</b> (Yb1) | 29.672 | 23.026 | 16.480 | 9.755 | 0.437 | 1.496 | 15.576 | 27.332 | 2.238 | 1.818 | 3.834 | 10.449 | 23.313 |
| <b>Yb-sq</b> (Yb2) | 28.870 | 23.175 | 17.116 | 9.986 | 0.342 | 1.615 | 15.441 | 27.547 | 2.160 | 1.711 | 3.847 | 10.715 | 23.764 |
| <b>Lu-sq</b> (Lu1) | 30.040 | 23.067 | 16.478 | 9.700 | 0.492 | 1.491 | 15.346 | 27.257 | 2.220 | 1.898 | 3.733 | 10.321 | 23.368 |
| <b>Lu-sq</b> (Lu2) | 28.754 | 23.165 | 17.219 | 9.953 | 0.348 | 1.558 | 15.529 | 27.654 | 2.131 | 1.698 | 3.797 | 10.703 | 23.794 |

**Table S4.** Geometry for the basal planes (#1 and #2 for Yb1; #3 and #4 for Yb2) in **Yb-sq**.

----- Plane number 1 -----

| Atoms Defining Plane | Distance | esd |
|----------------------|----------|-----|
| O1 [ 1; 0; 0; 0]     | -0.0673  | -   |
| O14 [ 1; 0; 0; 0]    | 0.0690   | -   |
| O15 [ 1; 0; 0; 0]    | 0.0673   | -   |
| O3 [ 1; 0; -1; 0]    | -0.0690  | -   |

Least-squares plane

$$9.22415x + 0.39552y + 5.48608z = 9.96507$$

(0.00028) (0.00029) (0.00031) (0.00013)

| Additional Atoms  | Distance | esd |
|-------------------|----------|-----|
| Yb1 [ 1; 0; 0; 0] | -1.2422  | -   |

Mean deviation from plane is 0.0681 angstrom  
Weight scheme: Sigma Weights  
Chi-squared: 1856811.720

----- Plane number 2 -----

| Atoms Defining Plane | Distance | esd |
|----------------------|----------|-----|
| O5 [ 1; 0; 0; 0]     | 0.0707   | -   |
| O13 [ 1; 0; 0; 0]    | -0.0705  | -   |
| O16 [ 1; 0; 0; 0]    | -0.0661  | -   |
| O4 [ 2; 0; 1; -1]    | 0.0659   | -   |

Least-squares plane

$$8.78371x + 0.52524y + 5.93517z = 7.27892$$

(0.00028) (0.00030) (0.00028) (0.00014)

| Additional Atoms  | Distance | esd |
|-------------------|----------|-----|
| Yb1 [ 1; 0; 0; 0] | 1.2919   | -   |

Mean deviation from plane is 0.0683 angstrom  
Weight scheme: Sigma Weights  
Chi-squared: 1868905.142

----- Plane number 3 -----

| Atoms Defining Plane | Distance | esd |
|----------------------|----------|-----|
| O8 [ 1; 0; 0; 0]     | 0.0487   | -   |
| O18 [ 1; 0; 0; 0]    | -0.0504  | -   |
| O19 [ 1; 0; 0; 0]    | 0.0489   | -   |
| O10 [ 2; 0; 1; 0]    | -0.0472  | -   |

Least-squares plane

$$9.21990x - 0.01681y + 5.50936z = 6.62986$$

(0.00026) (0.00030) (0.00029) (0.00014)

| Additional Atoms  | Distance | esd |
|-------------------|----------|-----|
| Yb2 [ 1; 0; 0; 0] | -1.2139  | -   |

Mean deviation from plane is 0.0488 angstrom  
Weight scheme: Sigma Weights  
Chi-squared: 952359.026

----- Plane number 4 -----

| Atoms Defining Plane | Distance | esd |
|----------------------|----------|-----|
| O9 [ 1; 0; 0; 0]     | 0.0751   | -   |
| O17 [ 1; 0; 0; 0]    | -0.0749  | -   |
| O20 [ 1; 0; 0; 0]    | -0.0730  | -   |
| O11 [ 1; 0;-1; 0]    | 0.0728   | -   |

Least-squares plane

$9.31815x + 0.05167y + 5.39937z = 4.10940$   
(0.00027) (0.00029) (0.00031) (0.00014)

| Additional Atoms  | Distance | esd |
|-------------------|----------|-----|
| Yb2 [ 1; 0; 0; 0] | 1.2876   | -   |

Mean deviation from plane is 0.0740 angstrom

Weight scheme: Sigma Weights

Chi-squared: 2188483.073

Dihedral angles between least-squares planes

-----

| plane | plane | angle | esd |
|-------|-------|-------|-----|
| 1     | 2     | 3.311 | -   |
| 1     | 3     | 2.912 | -   |
| 1     | 4     | 2.509 | -   |
| 2     | 3     | 4.905 | -   |
| 2     | 4     | 5.078 | -   |
| 3     | 4     | 0.895 | -   |

(Note) Symmetry code: [sym. equiv.; x-shift; y-shift; z-shift]

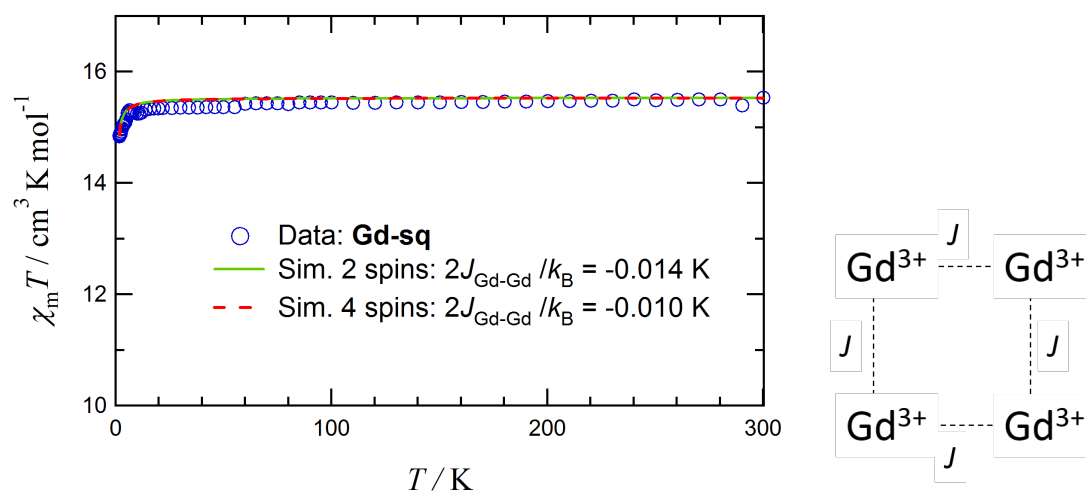

**Figure S1.** Simulation of the  $\chi_m T$  vs  $T$  plot for **Gd-sq**. A solid line implies the simulation curve of a dinuclear model  $H = -2J_{\text{Gd-Gd}} S_1 \cdot S_2$  with  $2J/k_B = -0.014 \text{ K}$  and a broken line the simulation curve of a square model  $H = -2J_{\text{Gd-Gd}} (S_1 \cdot S_2 + S_2 \cdot S_3 + S_3 \cdot S_4 + S_4 \cdot S_1)$  (the right panel) with  $2J/k_B = -0.010 \text{ K}$ . Calculation was performed on a Magpack software.<sup>S3</sup>

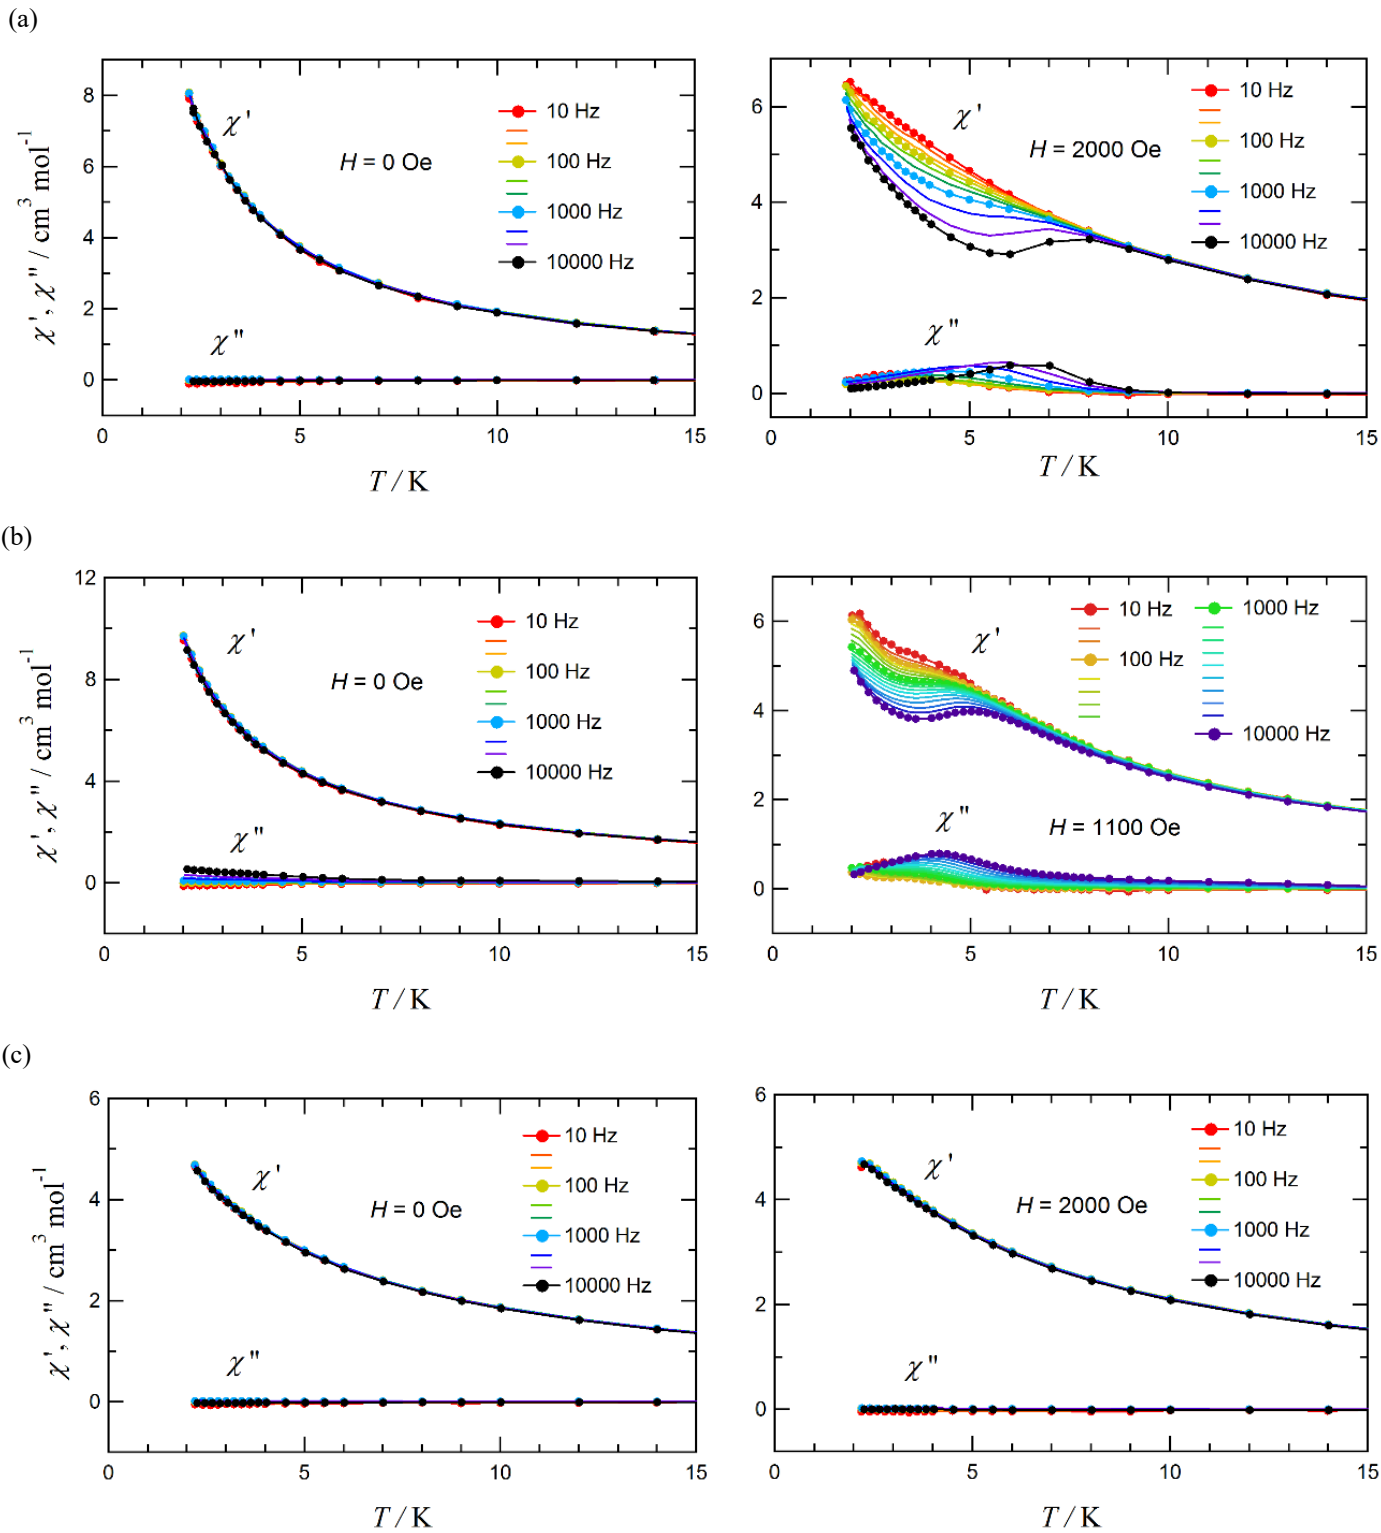



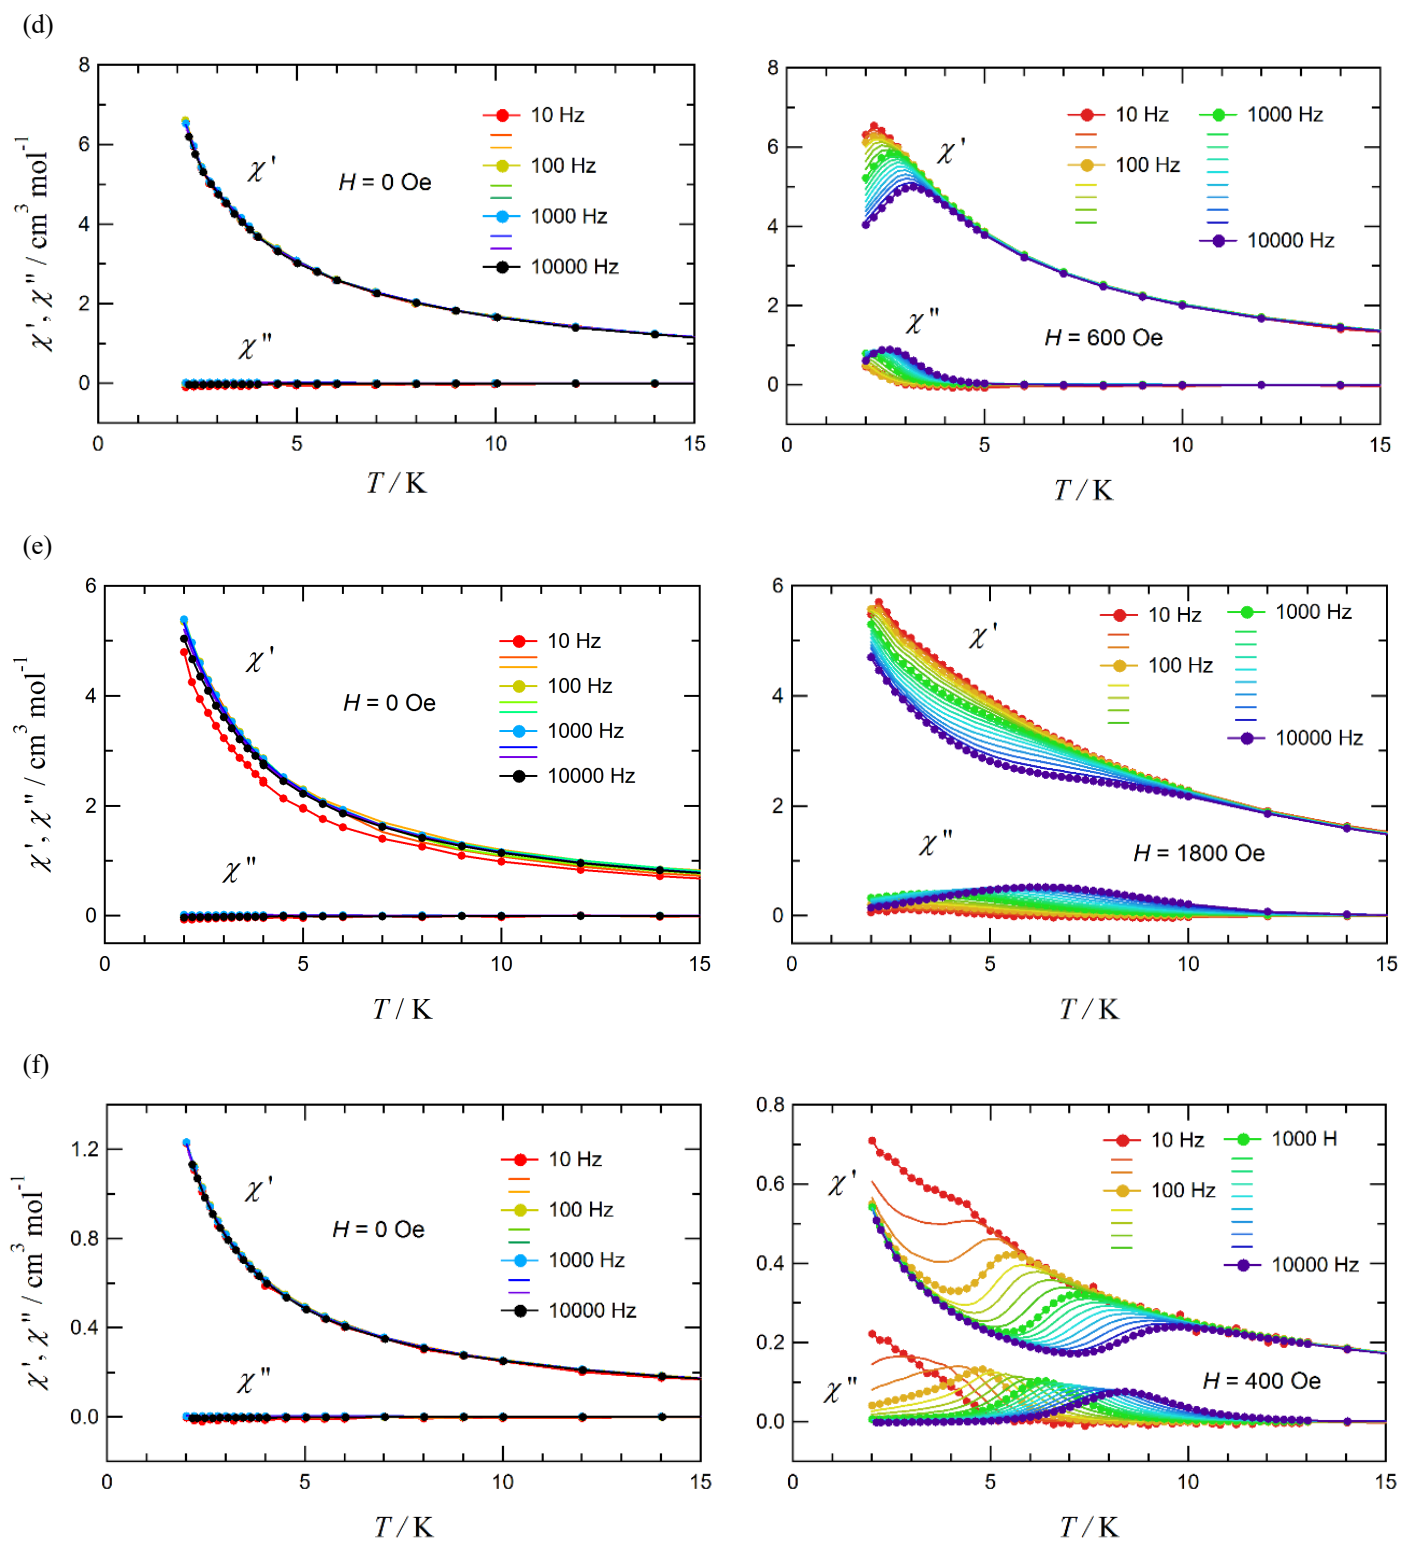

**Figure S2.** AC magnetic susceptibilities as a function of temperature for **Tb-sq** (a),<sup>S1</sup> **Dy-sq** (b), **Ho-sq** (c), **Er-sq** (d), **Tm-sq** (e), and **Yb-sq** (f). Left panels show the results without any bias field, and right panels with (optimized) applied DC fields, 2000, 1100, 1000, 600, 1800, and 400 Oe, respectively. The applied DC fields were optimized as shown in Figure S3.

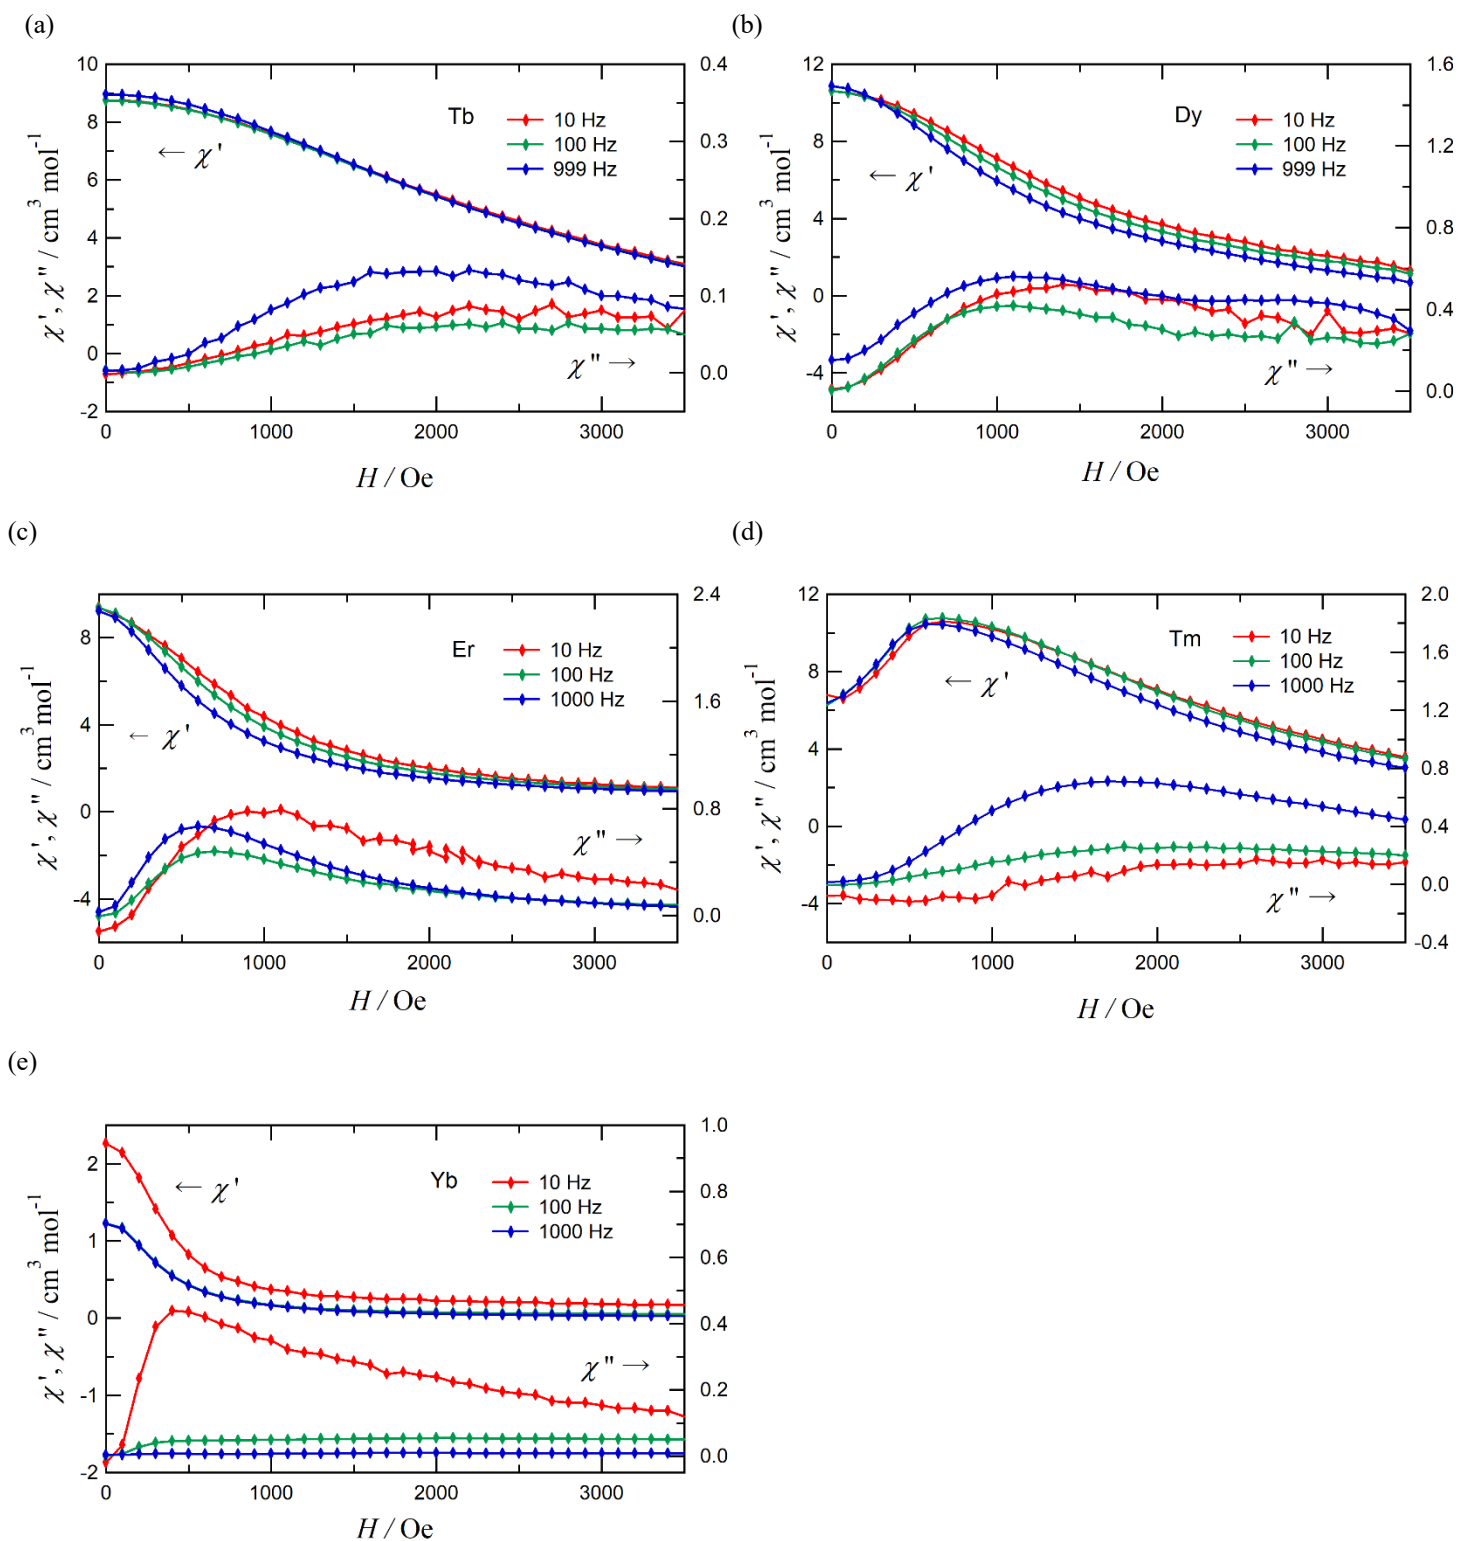

**Figure S3.** AC magnetic susceptibilities as a variation of a DC bias field for **Tb-sq** (a), **Dy-sq** (b), **Er-sq** (c), **Tm-sq** (d), and **Yb-sq** (e), measured at 2.0 K.

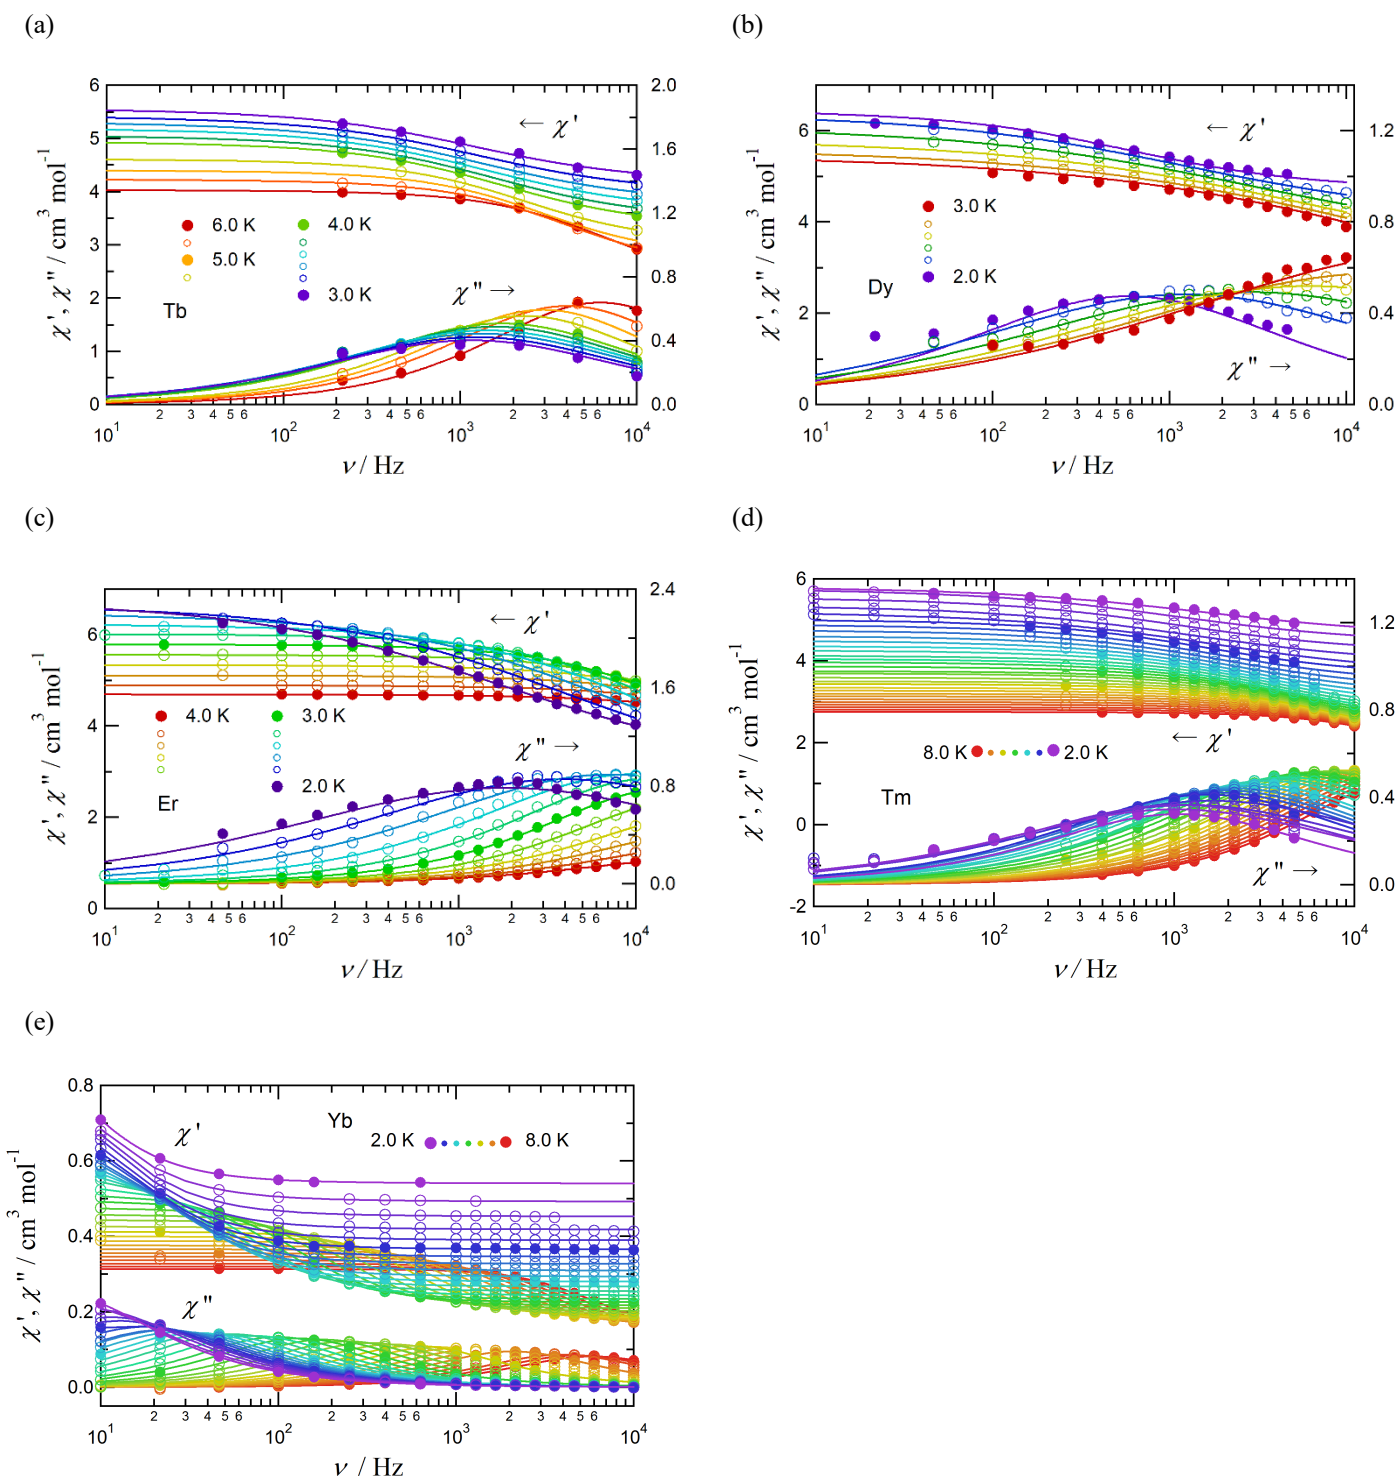

**Figure S4.** AC magnetic susceptibilities as a function of frequency for **Tb-sq** (a), **Dy-sq** (b), **Er-sq** (c), **Tm-sq** (d), and **Yb-sq** (e). The data were given from Figure S2. Solid lines are drawn according to the generalized Debye model. The optimized parameters are listed in Tables S5a – S5e.

**Table S5a.** Parameters for the generalized Debye model analysis on **Tb-sq.**

| Temp. | $\chi_T$ | $\chi_s$ | $\alpha$ | $\tau / 10^{-5}$ |
|-------|----------|----------|----------|------------------|
| 3.0   | 5.56(9)  | 4.16(7)  | 0.34(7)  | 13.7(20)         |
| 3.2   | 5.42(7)  | 3.96(6)  | 0.34(5)  | 12.8(15)         |
| 3.4   | 5.31(7)  | 3.76(6)  | 0.34(5)  | 12.0(12)         |
| 3.6   | 5.20(6)  | 3.60(6)  | 0.33(4)  | 11.2(10)         |
| 3.8   | 5.06(6)  | 3.45(6)  | 0.31(4)  | 10.1(9)          |
| 4.0   | 4.94(5)  | 3.31(5)  | 0.29(4)  | 9.2(7)           |
| 4.5   | 4.61(4)  | 3.03(5)  | 0.22(3)  | 6.8(4)           |
| 5.0   | 4.40(3)  | 2.78(4)  | 0.20(3)  | 5.4(2)           |
| 5.5   | 4.22(2)  | 2.52(5)  | 0.20(3)  | 3.9(2)           |
| 6.0   | 4.03(2)  | 2.32(7)  | 0.18(3)  | 2.6(2)           |

**Table S5b.** Parameters for the generalized Debye model analysis on **Dy-sq.**

| Temp. | $\chi_T$ | $\chi_s$ | $\alpha$ | $\tau / 10^{-4}$ |
|-------|----------|----------|----------|------------------|
| 2.0*  | 6.46(4)  | 4.70(4)  | 0.370(6) | 27.1(15)         |
| 2.2   | 6.39(17) | 4.1(2)   | 0.50(2)  | 12.8(7)          |
| 2.4   | 6.10(19) | 3.5(5)   | 0.54(2)  | 5.5(6)           |
| 2.6   | 5.82(13) | 3.0(4)   | 0.56(1)  | 2.6(3)           |
| 2.8   | 5.61(17) | 2.2(11)  | 0.59(2)  | 1.0(2)           |
| 3.0   | 5.47(4)  | 1.3(5)   | 0.60(2)  | 0.4(2)           |

\*Parameters  $\chi_T$ ,  $\chi_s$ , and  $\alpha$  were given from the Cole-Cole plot.

**Table S5c.** Parameters for the generalized Debye model analysis on **Er-sq.**

| Temp. | $\chi_T$ | $\chi_s$ | $\alpha$ | $\tau / 10^{-5}$ |
|-------|----------|----------|----------|------------------|
| 2.0   | 6.77(6)  | 2.95(10) | 0.21(2)  | 8.6(6)           |
| 2.2   | 6.66(3)  | 2.81(10) | 0.47(1)  | 4.1(3)           |
| 2.4   | 6.45(2)  | 2.93(12) | 0.41(2)  | 2.5(2)           |
| 2.6   | 6.23(2)  | 3.03(19) | 0.35(2)  | 1.6(2)           |
| 2.8   | 6.022(9) | 3.34(10) | 0.28(1)  | 1.32(10)         |
| 3.0   | 5.793(4) | 3.58(6)  | 0.226(8) | 1.08(5)          |
| 3.2   | 5.563(3) | 3.63(6)  | 0.211(9) | 0.78(5)          |
| 3.4   | 5.335(4) | 3.65(11) | 0.23(2)  | 0.57(8)          |
| 3.6   | 5.109(5) | 3.82(17) | 0.23(3)  | 0.52(16)         |
| 3.8   | 4.894(5) | 3.88(19) | 0.25(5)  | 0.44(2)          |
| 4.0   | 4.694(2) | 4.07(6)  | 0.25(3)  | 0.61(10)         |

**Table S5d.** Parameters for the generalized Debye model analysis on **Tm-sq**.

| Temp. | $\chi_T$   | $\chi_s$  | $\alpha$  | $\tau / 10^{-5}$ |
|-------|------------|-----------|-----------|------------------|
| 2.0*  | 5.75(2)    | 4.77(2)   | 0.26(3)   | 15(3)            |
| 2.2   | 5.76(2)    | 4.41(4)   | 0.40(2)   | 15.7(13)         |
| 2.4   | 5.544(15)  | 4.18(3)   | 0.37(2)   | 14.7(9)          |
| 2.6   | 5.35(2)    | 3.90(5)   | 0.41(2)   | 13.0(10)         |
| 2.8   | 5.07(3)    | 3.81(3)   | 0.29(3)   | 10.7(5)          |
| 3.0   | 5.01(2)    | 3.62(3)   | 0.32(2)   | 10.3(5)          |
| 3.2   | 4.88(2)    | 3.43(4)   | 0.33(2)   | 9.3(4)           |
| 3.4   | 4.75(2)    | 3.28(3)   | 0.32(2)   | 8.4(3)           |
| 3.6   | 4.61(2)    | 3.14(3)   | 0.31(2)   | 7.4(3)           |
| 3.8   | 4.49(1)    | 2.98(3)   | 0.315(13) | 6.4(2)           |
| 4.0   | 4.365(14)  | 2.87(2)   | 0.300(13) | 5.7(2)           |
| 4.2   | 4.254(12)  | 2.72(2)   | 0.294(11) | 4.81(11)         |
| 4.4   | 4.124(11)  | 2.614(16) | 0.275(10) | 4.22(8)          |
| 4.6   | 4.045(11)  | 2.48(2)   | 0.286(11) | 3.75(9)          |
| 4.8   | 3.968(11)  | 2.35(3)   | 0.295(12) | 3.29(11)         |
| 5.0   | 3.862(10)  | 2.27(3)   | 0.275(11) | 2.96(9)          |
| 5.2   | 3.747(6)   | 2.242(13) | 0.237(7)  | 2.76(4)          |
| 5.4   | 3.694(9)   | 2.09(3)   | 0.269(12) | 2.35(10)         |
| 5.6   | 3.591(7)   | 2.04(3)   | 0.247(10) | 2.16(7)          |
| 5.8   | 3.498(5)   | 2.01(2)   | 0.222(7)  | 2.02(4)          |
| 6.0   | 3.434(6)   | 1.90(3)   | 0.240(11) | 1.74(7)          |
| 6.2   | 3.342(4)   | 1.89(2)   | 0.206(6)  | 1.66(3)          |
| 6.4   | 3.271(4)   | 1.82(3)   | 0.205(9)  | 1.50(5)          |
| 6.6   | 3.195(2)   | 1.804(13) | 0.187(5)  | 1.42(2)          |
| 6.8   | 3.131(3)   | 1.73(3)   | 0.194(8)  | 1.26(4)          |
| 7.0   | 3.057(2)   | 1.740(11) | 0.166(4)  | 1.25(7)          |
| 7.2   | 2.991(2)   | 1.687(12) | 0.162(4)  | 1.13(2)          |
| 7.4   | 2.931(2)   | 1.64(2)   | 0.164(6)  | 1.03(3)          |
| 7.6   | 2.8655(11) | 1.637(12) | 0.146(4)  | 0.99(2)          |
| 7.8   | 2.8056(12) | 1.618(14) | 0.135(4)  | 0.93(2)          |
| 8.0   | 2.7497(11) | 1.58(2)   | 0.136(4)  | 0.85(2)          |

\*Parameters  $\chi_T$ ,  $\chi_s$ , and  $\alpha$  were given from the Cole-Cole plot.

**Table S5e.** Parameters for the generalized Debye model analysis on **Yb-sq**.

| Temp. | $\chi_T$   | $\chi_s$   | $\alpha$  | $\tau / 10^{-4}$ |
|-------|------------|------------|-----------|------------------|
| 2.0   | 1.115(9)   | 0.5404(6)  | 0.095(5)  | 278(6)           |
| 2.2   | 1.013(21)  | 0.492(1)   | 0.113(15) | 229(14)          |
| 2.4   | 0.948(8)   | 0.4527(5)  | 0.109(6)  | 187(4)           |
| 2.6   | 0.850(7)   | 0.4182(6)  | 0.097(8)  | 139(3)           |
| 2.8   | 0.807(6)   | 0.3896(5)  | 0.110(8)  | 125(3)           |
| 3.0   | 0.758(6)   | 0.3655(6)  | 0.102(8)  | 106(2)           |
| 3.2   | 0.719(4)   | 0.3457(6)  | 0.097(7)  | 89(2)            |
| 3.4   | 0.673(4)   | 0.3269(6)  | 0.085(8)  | 73(1)            |
| 3.6   | 0.662(3)   | 0.3093(5)  | 0.098(5)  | 67.3(9)          |
| 3.8   | 0.631(2)   | 0.2934(5)  | 0.090(5)  | 56.3(7)          |
| 4.0   | 0.604(2)   | 0.2796(4)  | 0.075(4)  | 46.0(4)          |
| 4.2   | 0.582(2)   | 0.2666(4)  | 0.070(4)  | 36.9(3)          |
| 4.4   | 0.600(2)   | 0.2547(5)  | 0.052(5)  | 28.9(3)          |
| 4.6   | 0.5335(9)  | 0.2439(3)  | 0.040(3)  | 21.84(13)        |
| 4.8   | 0.510(2)   | 0.2343(6)  | 0.023(6)  | 16.1(2)          |
| 5.0   | 0.4944(11) | 0.2254(4)  | 0.025(4)  | 12.16(9)         |
| 5.2   | 0.475(2)   | 0.2176(9)  | 0.012(8)  | 8.85(12)         |
| 5.4   | 0.4572(12) | 0.2097(6)  | 0.011(6)  | 6.53(6)          |
| 5.6   | 0.4430(10) | 0.2021(7)  | 0.016(5)  | 4.89(4)          |
| 5.8   | 0.4259(6)  | 0.1954(5)  | 0.010(3)  | 3.62(2)          |
| 6.0   | 0.4116(6)  | 0.1894(5)  | 0.008(4)  | 2.724(15)        |
| 6.2   | 0.3993(5)  | 0.1835(5)  | 0.009(4)  | 2.075(11)        |
| 6.4   | 0.3872(5)  | 0.1780(6)  | 0.010(4)  | 1.596(9)         |
| 6.6   | 0.3756(4)  | 0.1732(4)  | 0.007(3)  | 1.235(5)         |
| 6.8   | 0.3655(3)  | 0.1688(3)  | 0.006(2)  | 0.970(3)         |
| 7.0   | 0.3552(3)  | 0.1648(3)  | 0.003(2)  | 0.767(2)         |
| 7.2   | 0.3462(6)  | 0.1604(11) | 0.008(6)  | 0.615(5)         |
| 7.4   | 0.3365(4)  | 0.1563(8)  | 0.010(4)  | 0.495(3)         |
| 7.6   | 0.3274(2)  | 0.1536(4)  | 0.004(2)  | 0.4015(13)       |
| 7.8   | 0.3200(2)  | 0.1502(6)  | 0.007(2)  | 0.3277(15)       |
| 8.0   | 0.3128(2)  | 0.1474(9)  | 0.010(4)  | 0.271(2)         |

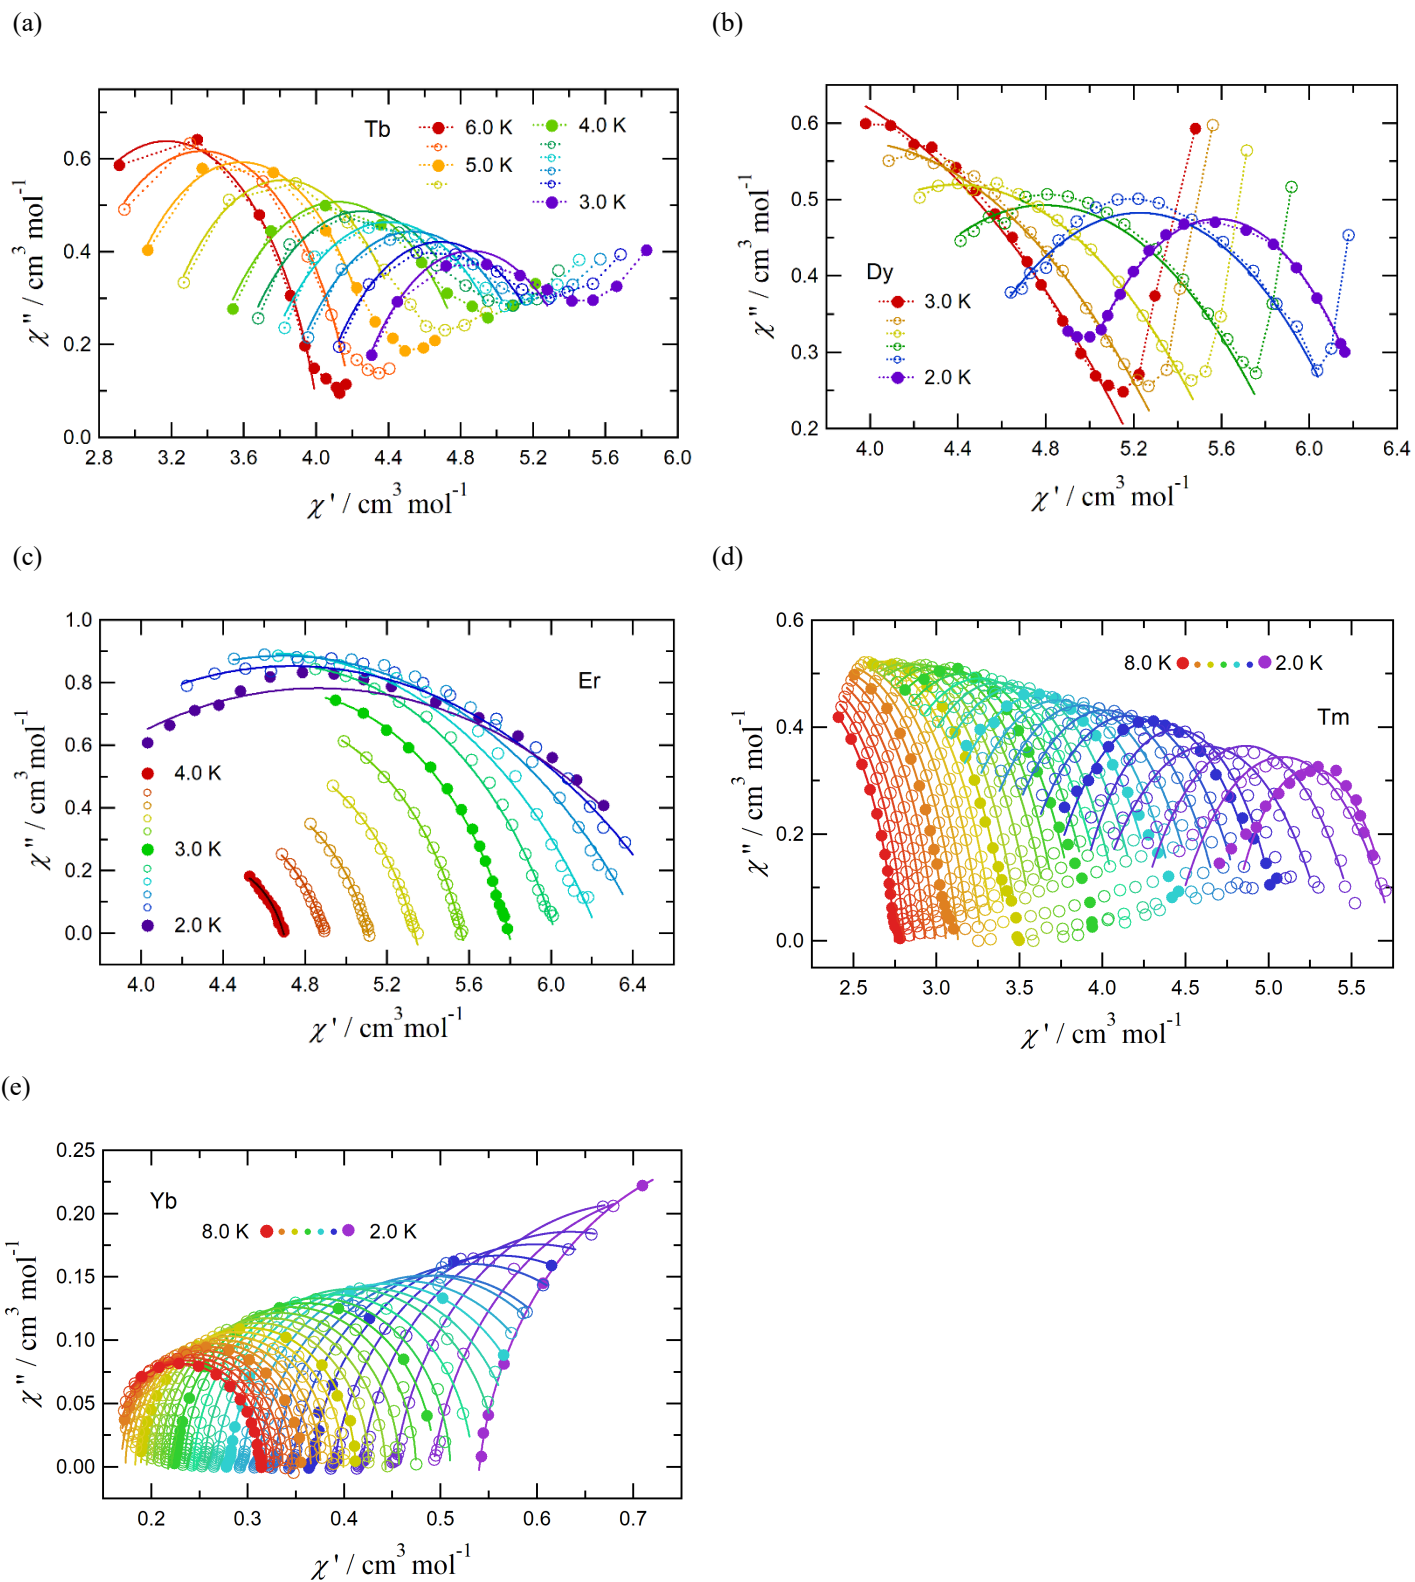

**Figure S5.** Cole-Cole plots for **Tb-sq** (a),<sup>S1</sup> **Dy-sq** (b), **Er-sq** (c), **Tm-sq** (d), and **Yb-sq** (e). The data were given from Figure S2. For solid lines, see the main text. Dotted lines are drawn for a guide to the eye. The  $\alpha$  values are calculated in Figure S4 and listed in Tables S5a – S5e.

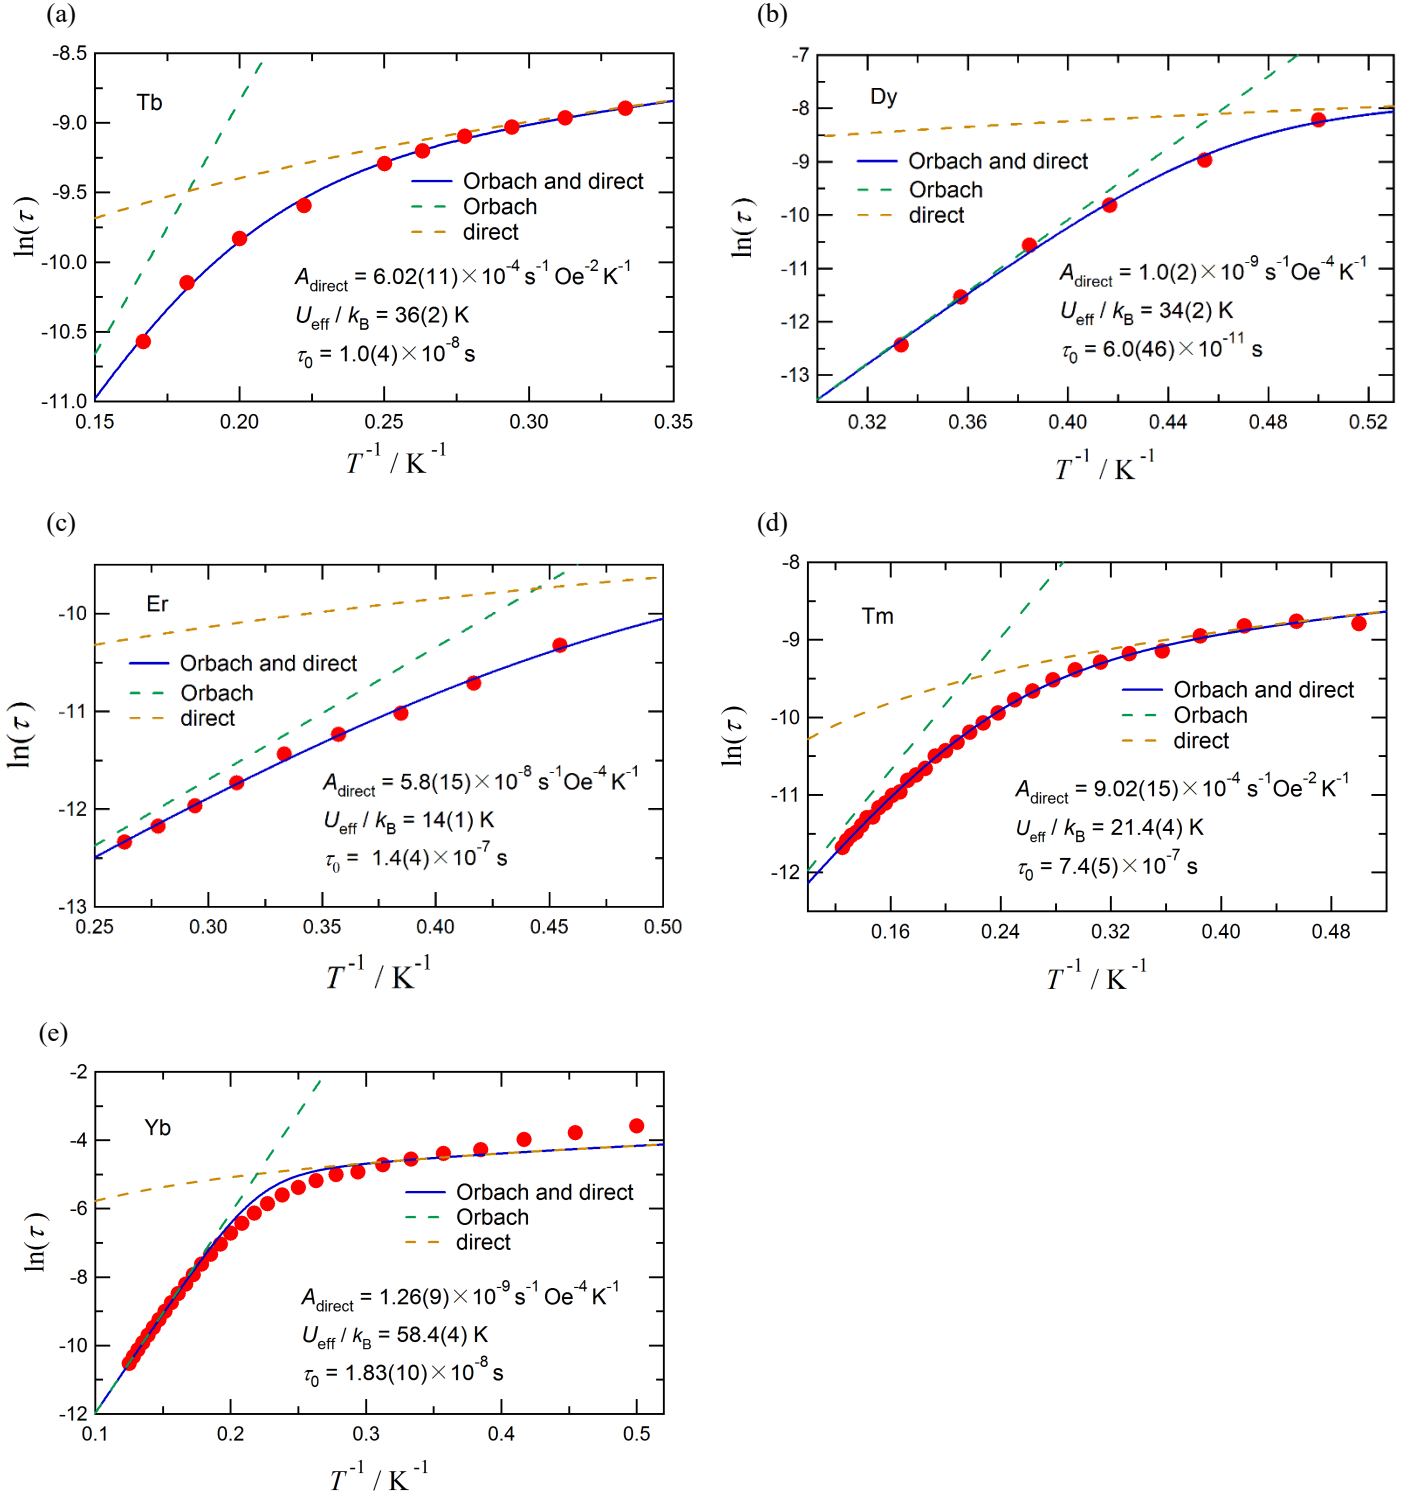

**Figure S6.** Arrhenius plots for **Tb-sq** (a),<sup>S1</sup> **Dy-sq** (b), **Er-sq** (c), **Tm-sq** (d), and **Yb-sq**. The data were given from Figure S2. Solid lines are drawn as calculation based on the sum of the Orbach and direct terms ( $\tau^{-1} = \tau_0^{-1} \exp(-U_{\text{eff}}/k_{\text{B}}T) + A_{\text{direct}}H^n_{\text{direct}}T$ ). The optimized parameters are indicated in the figures. For the result of **Tb-sq**, the parameters  $U_{\text{eff}}$  and  $\tau_0$  were different from those of the reference, in which only the Orbach relaxation was applied to the fitting.<sup>S1</sup> For the result of **Yb-sq**, a more satisfactory fit is given by introducing the Raman term (see the main text).



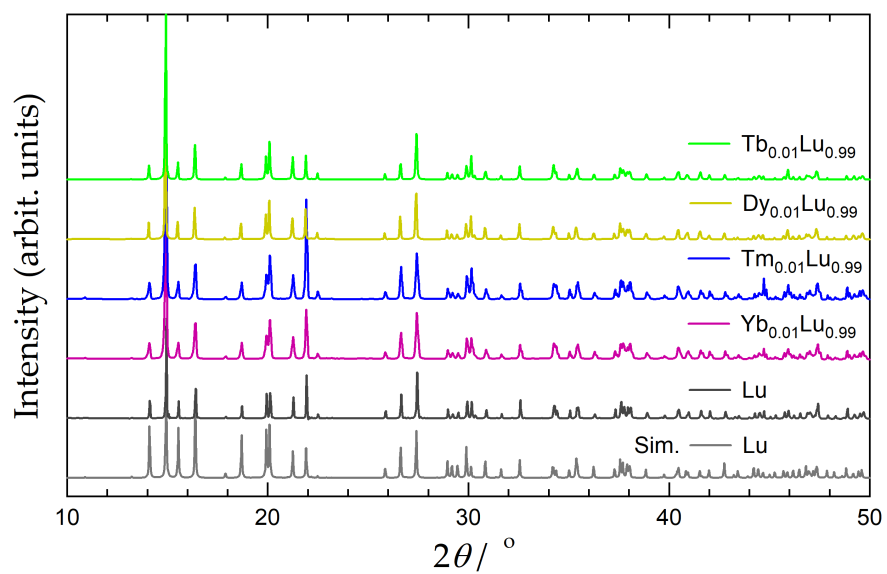

**Figure S7.** Powder X-ray diffraction patterns for 1% diluted samples **Tb/Lu-sq**, **Dy/Lu-sq**, **Tm/Lu-sq**, and **Yb/Lu-sq**, together with experimental and calculated profiles of **Lu-sq**.

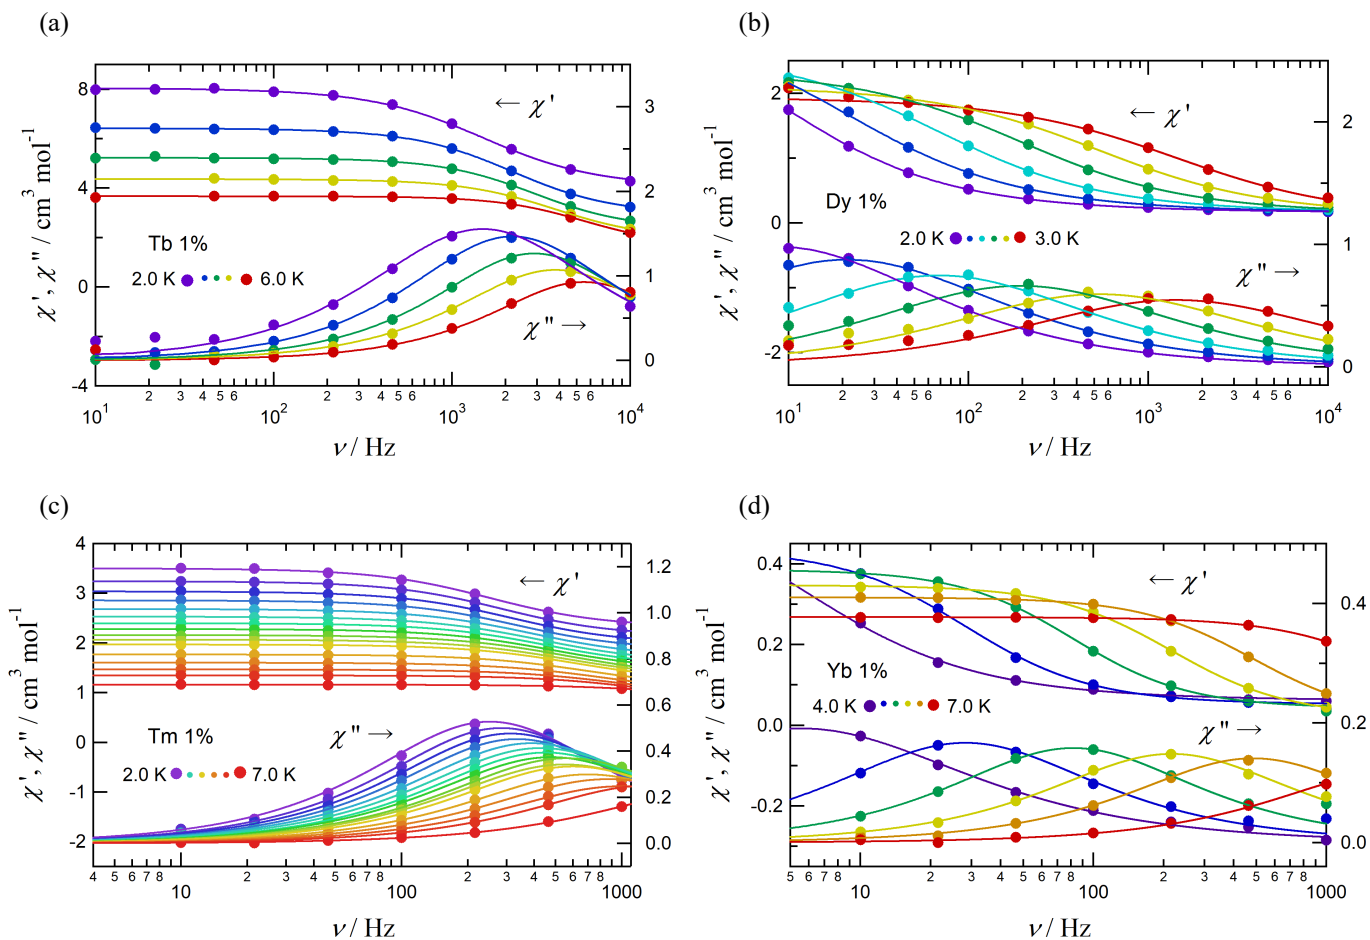

**Figure S8.** AC magnetic susceptibilities as a function of frequency for 1% diluted samples **Tb/Lu-sq** (a), **Dy/Lu-sq** (b), **Tm/Lu-sq** (c), and **Yb/Lu-sq** (d). Solid lines are drawn according to the generalized Debye model. The optimized parameters are listed in Tables S6.

**Table S6.** Parameters for the generalized Debye model analysis for **Tb/Lu-sq** (a), **Dy/Lu-sq** (b), **Tm/Lu-sq** (c), and **Yb/Lu-sq** (d).

(a)

| Temp. | $\chi_T$  | $\chi_s$ | $\alpha$  | $\tau / 10^{-5}$ |
|-------|-----------|----------|-----------|------------------|
| 2.0   | 8.05(4)   | 4.02(8)  | 0.16(2)   | 10.7(5)          |
| 3.0   | 6.422(14) | 2.92(4)  | 0.113(10) | 7.29(15)         |
| 4.0   | 5.227(13) | 2.34(4)  | 0.084(12) | 5.50(13)         |
| 5.0   | 4.366(8)  | 1.92(3)  | 0.084(9)  | 4.19(7)          |
| 6.0   | 3.671(16) | 1.67(7)  | 0.05(3)   | 2.89(15)         |

(b)

| Temp. | $\chi_T$ | $\chi_s$  | $\alpha$  | $\tau / 10^{-3}$ |
|-------|----------|-----------|-----------|------------------|
| 2.0   | 3.47(6)  | 0.164(5)  | 0.320(7)  | 17.7(8)          |
| 2.2   | 3.18(7)  | 0.158(12) | 0.333(12) | 7.5(4)           |
| 2.4   | 2.65(3)  | 0.158(13) | 0.313(11) | 2.31(8)          |
| 2.6   | 2.36(2)  | 0.143(13) | 0.315(10) | 0.81(2)          |
| 2.8   | 2.12(3)  | 0.11(2)   | 0.321(15) | 0.298(11)        |
| 3.0   | 19.4(3)  | 0.07(4)   | 0.33(2)   | 0.112(5)         |

(c)

| Temp. | $\chi_T$   | $\chi_s$  | $\alpha$  | $\tau / 10^{-4}$ |
|-------|------------|-----------|-----------|------------------|
| 2.0   | 3.502(10)  | 2.310(18) | 0.078(16) | 6.33(17)         |
| 2.2   | 3.243(6)   | 2.134(12) | 0.066(11) | 5.60(10)         |
| 2.4   | 3.038(6)   | 1.976(13) | 0.069(12) | 5.10(10)         |
| 2.6   | 2.858(6)   | 1.857(15) | 0.064(14) | 4.77(11)         |
| 2.8   | 2.685(3)   | 1.700(9)  | 0.080(8)  | 4.09(6)          |
| 3.0   | 2.532(4)   | 1.590(13) | 0.083(11) | 3.71(8)          |
| 3.2   | 2.3973(18) | 1.519(6)  | 0.069(5)  | 3.52(3)          |
| 3.4   | 2.281(4)   | 1.440(12) | 0.747(11) | 3.33(7)          |
| 3.6   | 2.160(3)   | 1.324(13) | 0.079(11) | 2.84(6)          |
| 3.8   | 2.067(3)   | 1.297(9)  | 0.0742(9) | 2.89(5)          |
| 4.0   | 1.9688(18) | 1.229(7)  | 0.065(7)  | 2.65(4)          |
| 4.5   | 1.7687(15) | 1.101(7)  | 0.069(7)  | 2.27(4)          |
| 5.0   | 1.6038(15) | 0.975(9)  | 0.077(8)  | 1.84(4)          |
| 5.5   | 1.4660(17) | 0.913(12) | 0.070(12) | 1.61(5)          |
| 6.0   | 1.3465(17) | 0.789(20) | 0.063(15) | 1.17(6)          |
| 7.0   | 1.1615(14) | 0.61(6)   | 0.091(22) | 0.53(8)          |

(d)

| Temp. | $\chi_T$   | $\chi_s$   | $\alpha$  | $\tau / 10^{-3}$ |
|-------|------------|------------|-----------|------------------|
| 4.0   | 0.61(5)    | 0.061(4)   | 0.23(3)   | 28.4(5)          |
| 4.5   | 0.439(6)   | 0.051(3)   | 0.095(15) | 5.63(15)         |
| 5.0   | 0.3864(14) | 0.0416(16) | 0.055(6)  | 1.939(17)        |
| 5.5   | 0.347(2)   | 0.021(4)   | 0.061(13) | 0.733(15)        |
| 6.0   | 0.3170(12) | 0.013(4)   | 0.049(10) | 0.328(6)         |
| 7.0   | 0.2682(10) | 0.002(23)  | 0.066(26) | 0.07(10)         |

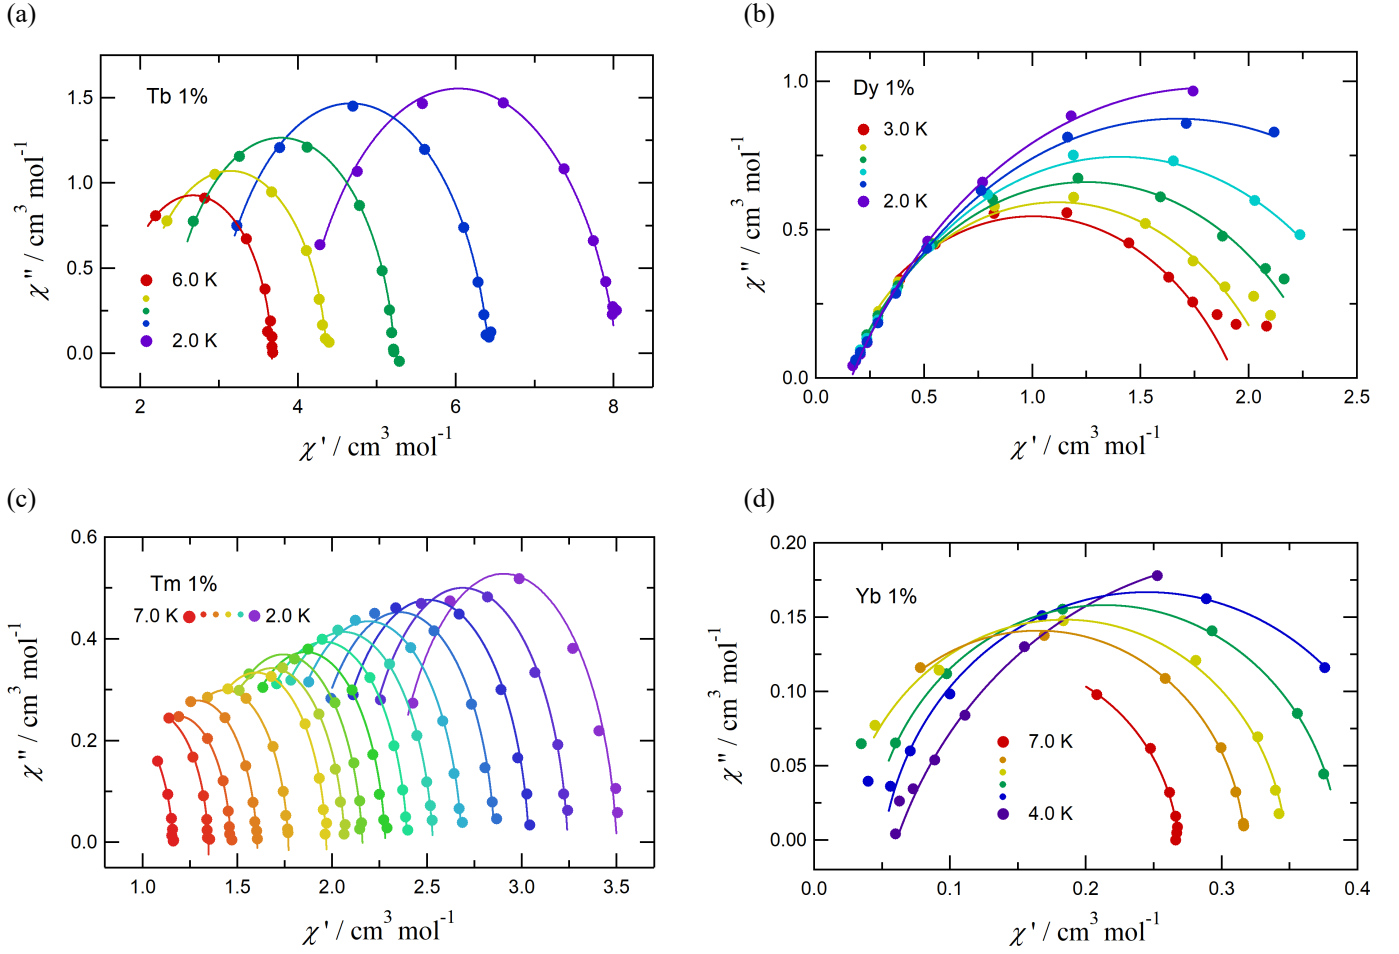

**Figure S9.** Cole-Cole plots for 1% diluted samples **Tb/Lu-sq** (a), **Dy/Lu-sq** (b), **Tm/Lu-sq** (c), and **Yb/Lu-sq** (d). The data were given from Figure S8. Solid lines are drawn as calculation according to the generalized Debye model (eqn (1) in the main text). The optimized parameters are listed in Tables S6a – S6d.

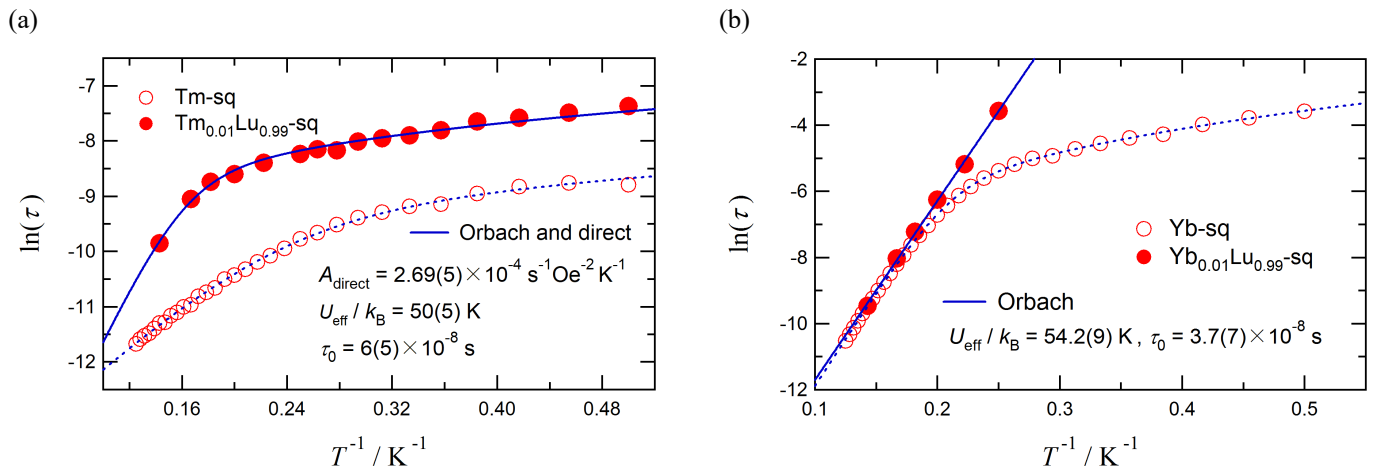

**Figure S10.** Arrhenius plots for 1% diluted samples **Tm/Lu-sq** (a) and **Yb/Lu-sq** (b). The data were given from Figure S8. The data of undiluted samples are superposed. Solid lines are drawn as calculation based on the equations  $\tau^{-1} = \tau_0^{-1} \exp(-U_{\text{eff}}/k_B T) + A_{\text{direct}} H^{n_{\text{direct}}} T$  for (a) and  $\tau^{-1} = \tau_0^{-1} \exp(-U_{\text{eff}}/k_B T)$  for (b). The optimized parameters are indicated in the figures, though the accuracy is limited because of the unsatisfactory signal/noise ratio from diluted samples.

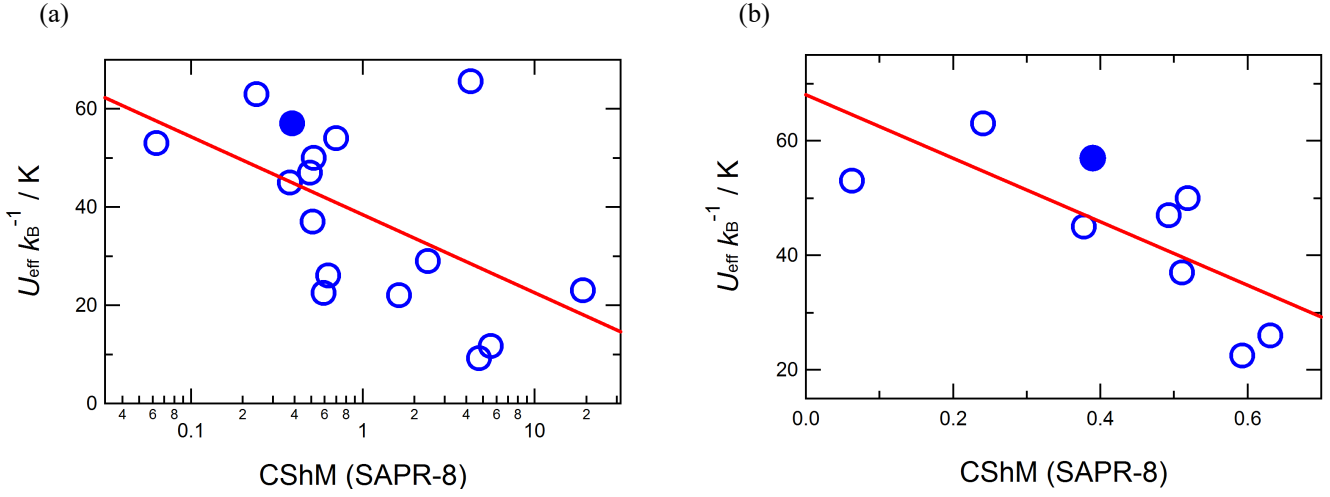

| OP     | HPY     | HBPY   | CU     | SAPR          | TDD    | JGBF    | JETBPY  | JBTPR  | BTPR   | JSD    | TT     | ETBPY   | $U_{\text{eff}}$ | Ref.      |
|--------|---------|--------|--------|---------------|--------|---------|---------|--------|--------|--------|--------|---------|------------------|-----------|
| 29.437 | 23.848  | 17.595 | 10.441 | <b>0.241</b>  | 2.391  | 16.597  | 28.864  | 2.146  | 1.648  | 4.767  | 11.096 | 24.734  | 63               | S4        |
| 28.882 | 24.055  | 16.938 | 10.697 | <b>0.631</b>  | 1.364  | 14.624  | 28.377  | 1.427  | 1.174  | 3.349  | 11.311 | 24.860  | 26               | S5        |
| 29.686 | 23.225  | 16.375 | 10.253 | <b>0.702</b>  | 1.354  | 14.148  | 27.493  | 2.303  | 1.743  | 3.487  | 10.843 | 23.768  | 54               | S6        |
| 29.593 | 23.596  | 16.486 | 10.554 | <b>0.519</b>  | 1.754  | 15.187  | 28.307  | 1.870  | 1.104  | 4.006  | 11.260 | 24.294  | 50               | S7        |
| 30.679 | 22.023  | 15.544 | 9.055  | <b>0.493</b>  | 2.484  | 16.544  | 28.633  | 3.174  | 2.543  | 5.566  | 9.872  | 24.174  | 47               | S7        |
| 32.154 | 22.075  | 14.197 | 10.313 | <b>1.629</b>  | 1.757  | 13.775  | 25.639  | 2.608  | 1.868  | 4.498  | 10.994 | 21.932  | 22               | S7        |
| 29.786 | 22.679  | 16.048 | 9.962  | <b>0.511</b>  | 2.781  | 16.232  | 28.123  | 2.935  | 2.568  | 5.350  | 10.794 | 24.090  | 37               | S7        |
| 27.734 | 23.998  | 17.236 | 9.766  | <b>0.063</b>  | 2.453  | 16.856  | 28.668  | 2.802  | 2.250  | 5.187  | 10.582 | 24.054  | 53               | S8        |
| 28.763 | 23.650  | 16.887 | 10.640 | <b>0.378</b>  | 1.909  | 15.488  | 28.258  | 1.882  | 1.374  | 4.282  | 11.397 | 24.073  | 45               | S9        |
| 33.097 | 23.344  | 16.970 | 9.449  | <b>0.593</b>  | 2.596  | 17.541  | 30.395  | 3.376  | 2.792  | 5.822  | 10.270 | 25.874  | 22.5             | S10       |
| 33.588 | 23.818  | 15.353 | 13.146 | <b>4.257</b>  | 1.740  | 10.569  | 28.210  | 4.001  | 3.637  | 3.172  | 13.387 | 23.021  | 65.58            | S11       |
| 25.485 | 20.766  | 13.810 | 13.926 | <b>5.576</b>  | 5.635  | 9.780   | 24.467  | 4.444  | 3.087  | 6.623  | 14.514 | 18.516  | 11.7             | S12       |
| 31.240 | 24.550  | 16.635 | 12.283 | <b>2.393</b>  | 2.099  | 13.726  | 27.476  | 1.068  | 0.475  | 3.706  | 12.825 | 23.600  | 29               | S13       |
| 28.703 | 24.705  | 13.056 | 11.906 | <b>4.749</b>  | 2.780  | 9.630   | 25.324  | 3.742  | 3.523  | 2.314  | 12.734 | 22.931  | 9.2              | S14       |
| 31.620 | 22.026  | 0.584  | 9.205  | <b>19.158</b> | 16.418 | 10.710  | 25.863  | 18.583 | 18.226 | 18.850 | 10.061 | 23.148  | 23               | S15       |
| 29.271 | 23.1005 | 16.798 | 9.8705 | <b>0.3895</b> | 1.5555 | 15.5085 | 27.4395 | 2.199  | 1.7645 | 3.8405 | 10.582 | 23.5385 | 57.0             | this work |

**Figure S11.** (a) Correlation between  $U_{\text{eff}}$  and CShM (in a log scale) referred to SAPR-8. (b) A magnification plot in a small CShM region (in a linear scale) for emphasis on the data from SAPR-8 structures. Literature data<sup>S4-S15</sup> are shown with open circles. The **Yb-sq** data as an averaged value is shown with a filled circle. For the polyhedron symbols, see Figure S3.

**Table S7.** Cartesian coordinates of the model Tm and Yb complexes used for CASSCF/NEVPT2 calculations.

| Tm1 complex |                |                |                | Tm2 complex |                |                |                |
|-------------|----------------|----------------|----------------|-------------|----------------|----------------|----------------|
| Atom        | $x / \text{Å}$ | $y / \text{Å}$ | $z / \text{Å}$ | Atom        | $x / \text{Å}$ | $y / \text{Å}$ | $z / \text{Å}$ |
| Tm          | 0.000000       | 0.000000       | 0.000000       | Tm          | 0.000000       | 0.000000       | 0.000000       |
| O           | -3.376474      | -5.486653      | 0.397431       | O           | -4.420741      | -3.304922      | -0.755092      |
| C           | -1.185330      | -3.044439      | 0.939071       | C           | -1.483678      | 2.685034       | -1.206934      |
| C           | -1.084083      | -4.522874      | 0.870723       | C           | -3.968785      | 1.196051       | 2.140460       |
| C           | -2.526454      | -4.591668      | 0.707364       | O           | -3.815443      | 3.551984       | -0.990849      |
| C           | -2.631780      | -3.160283      | 0.897316       | O           | -4.885588      | 0.340639       | 2.222214       |
| C           | -1.293662      | 2.834478       | -1.464532      | C           | -1.160740      | -3.753454      | -1.242042      |
| O           | -0.313228      | -2.134269      | 0.899617       | C           | -1.993354      | -2.575984      | -0.954881      |
| O           | -0.157321      | -5.356099      | 0.856417       | C           | -3.192719      | -3.457059      | -0.867044      |
| O           | -0.181846      | 1.922010       | 1.413425       | C           | -2.332885      | -4.625735      | -1.052900      |
| O           | -3.569548      | -2.296808      | 0.920905       | O           | 0.030239       | -3.939316      | -1.594395      |
| O           | -1.191821      | 1.566942       | -1.341363      | O           | -1.790760      | -1.345276      | -0.855274      |
| O           | -3.564405      | 3.681160       | -2.190802      | O           | -2.522655      | -5.866086      | -1.119657      |
| O           | -1.083452      | -1.070400      | -1.767814      | C           | 3.103519       | -2.548499      | 0.695794       |
| H           | -1.319116      | -1.850798      | -1.525717      | O           | -1.434395      | 1.451943       | -0.996496      |
| H           | -0.526364      | -1.203068      | -2.395860      | O           | -1.748194      | 0.235684       | 1.558177       |
| O           | -2.115154      | 0.039956       | 1.000932       | O           | 2.186716       | -3.403911      | 0.777547       |
| H           | -2.797301      | -0.506210      | 0.821740       | O           | 1.013610       | -1.445925      | -1.517539      |
| H           | -2.407344      | 0.746836       | 0.845926       | H           | 0.803133       | -2.231570      | -1.719945      |
| O           | 1.641131       | -0.240111      | 1.567691       | H           | 1.737316       | -1.307486      | -1.926652      |
| H           | 1.954223       | -0.958329      | 1.882844       | O           | 0.054909       | -1.873467      | 1.337568       |
| H           | 2.028144       | 0.363344       | 2.009812       | H           | 0.557730       | -2.462683      | 0.982522       |
| O           | 1.544680       | 1.440892       | -0.891029      | H           | -0.711807      | -2.243434      | 1.362684       |
| O           | 1.625616       | -1.406569      | -1.065816      | C           | -1.609597      | 4.758827       | -1.399210      |
| C           | 2.009298       | 4.364224       | 1.955065       | C           | -2.572498      | 3.673238       | -1.138755      |
| C           | 2.110546       | 2.885789       | 1.886716       | C           | -3.929623      | 2.668209       | 2.182754       |
| C           | 0.668175       | 2.816995       | 1.723357       | C           | -2.470811      | 2.632444       | 2.001843       |
| C           | 0.562849       | 4.248380       | 1.913310       | C           | -2.534363      | 1.149994       | 1.857666       |
| C           | -0.373659      | 3.936609       | -1.251525      | O           | -1.656106      | 5.993161       | -1.416199      |
| C           | -1.503726      | 4.868299       | -1.420109      | O           | -4.798099      | 3.572759       | 2.251087       |
| C           | -2.381078      | 3.744805       | -1.787179      | O           | -1.558157      | 3.487199       | 1.956406       |
| O           | 2.881401       | 5.274394       | 1.915611       | C           | -0.585059      | 3.753581       | -1.614319      |
| O           | 3.037308       | 2.052564       | 1.872410       | C           | 3.142680       | -1.076341      | 0.738087       |
| O           | -0.374920      | 5.111855       | 1.936899       | C           | 4.601493       | -1.112105      | 0.557176       |
| O           | 0.836922       | 4.049586       | -1.032985      | C           | 4.537941       | -2.594555      | 0.413000       |
| O           | -1.725040      | 6.095931       | -1.260637      | O           | 0.611978       | 3.798243       | -2.058500      |
| H           | 2.388199       | 1.349096       | -0.843302      | O           | 2.274205       | -0.171791      | 0.806420       |
| H           | 1.424806       | 2.281053       | -0.945637      | O           | 5.514147       | -0.257350      | 0.511739       |
| C           | 3.807294       | -2.623910      | -1.112064      | O           | 0.576685       | 1.879030       | 1.310608       |
| C           | 4.942324       | -1.704901      | -0.851637      | H           | -0.129035      | 2.231292       | 1.638998       |
| C           | 4.010454       | -0.589790      | -0.852640      | H           | 1.032908       | 1.655389       | 2.004428       |
| C           | 2.894348       | -1.502506      | -0.984148      | O           | 1.318916       | 1.278293       | -1.444865      |
| O           | 3.762539       | -3.840025      | -1.443108      | H           | 2.032511       | 1.052385       | -1.828774      |
| O           | 6.180882       | -1.815040      | -0.766782      | H           | 1.173724       | 2.060432       | -1.720367      |
| O           | 4.093905       | 0.680035       | -0.865699      | O           | 5.324110       | -3.508865      | 0.113511       |
| H           | -2.918632      | -6.346857      | 0.319149       | H           | -3.475637      | -6.049707      | -0.989947      |
| H           | 3.765395       | 4.863376       | 1.842996       | H           | -2.566293      | 6.299197       | -1.235068      |
| H           | -0.993099      | 6.499500       | -0.750901      | H           | -4.405565      | 4.427701       | 1.988190       |
| H           | 6.584942       | -0.932151      | -0.645340      | H           | 6.226377       | -3.151340      | -0.010031      |

| Yb1 complex |                |                |                | Yb2 complex |                |                |                |
|-------------|----------------|----------------|----------------|-------------|----------------|----------------|----------------|
| Atom        | $x / \text{Å}$ | $y / \text{Å}$ | $z / \text{Å}$ | Atom        | $x / \text{Å}$ | $y / \text{Å}$ | $z / \text{Å}$ |
| Yb          | 0.000000       | 0.000000       | 0.000000       | Yb          | 0.000003       | 0.000000       | -0.000001      |
| O           | -2.394538      | -3.392190      | 0.893208       | O           | -6.078218      | -1.879715      | -0.469572      |
| O           | 1.794396       | -5.777112      | -1.744725      | O           | 2.400831       | -2.893175      | 2.198809       |
| O           | -0.611392      | -3.635176      | -1.809832      | O           | -1.525161      | -1.652827      | -0.894092      |
| O           | 3.969603       | -3.333355      | -1.777879      | O           | -3.671912      | -4.085899      | -0.734070      |
| O           | 2.281704       | -3.400307      | 1.154217       | O           | 1.142494       | -1.641197      | -1.249982      |
| O           | 5.521057       | -2.983779      | 1.446991       | H           | 1.863819       | -1.308737      | -1.584016      |
| H           | -0.708777      | -2.622609      | 0.945290       | H           | 0.696663       | -1.894332      | -1.950934      |
| H           | 0.619049       | -2.568462      | 1.012154       | O           | 0.054203       | -1.825489      | 1.442629       |
| C           | 1.758869       | -4.525206      | -1.808922      | H           | -0.618473      | -2.161913      | 1.816104       |
| C           | 0.637643       | -3.565547      | -1.780499      | H           | 0.704884       | -2.105553      | 1.898042       |
| C           | 1.584215       | -2.472488      | -1.638120      | C           | 3.162771       | -1.950259      | 1.807566       |
| C           | 2.683907       | -3.410777      | -1.768851      | C           | -2.773630      | -1.744458      | -0.891227      |
| C           | 3.057244       | -2.441285      | 1.358409       | C           | -3.747621      | -2.840837      | -0.784132      |
| C           | 4.506607       | -2.276939      | 1.569360       | C           | -4.858113      | -1.849428      | -0.696418      |
| C           | 4.292957       | -0.865406      | 1.902014       | O           | 5.583536       | -2.541051      | 1.734125       |
| O           | -5.412793      | 0.001183       | 1.335439       | O           | 5.923907       | 1.418671       | -1.913603      |
| O           | -5.622559      | -3.151963      | 0.708051       | O           | 3.777150       | -1.014403      | -1.753581      |
| C           | -4.565205      | -0.876293      | 1.045125       | C           | 4.598291       | -1.773908      | 1.673271       |
| C           | -4.685649      | -2.329734      | 0.817302       | C           | 4.384876       | -0.343787      | 1.388037       |
| C           | -3.237448      | -2.446211      | 0.831242       | C           | 4.675422       | 1.327039       | -1.910737      |
| C           | -3.124913      | -1.004252      | 0.953268       | C           | 3.701440       | 0.230664       | -1.803643      |
| O           | -1.302082      | 1.689163       | -0.951887      | C           | 2.590939       | 1.222070       | -1.715926      |
| O           | -3.707871      | 3.831099       | -1.016995      | O           | -3.137394      | 2.471402       | 1.420515       |
| O           | 1.523573       | -1.239807      | -1.344804      | O           | 0.052364       | 2.238750       | 0.850160       |
| O           | 0.873124       | 4.132919       | -0.985042      | O           | -2.977327      | 5.675926       | 0.947829       |
| O           | 1.913645       | -0.194285      | 1.389736       | C           | -2.221165      | 3.272348       | 1.127112       |
| O           | 5.051461       | 0.035490       | 2.312496       | C           | -0.771231      | 3.175439       | 0.902457       |
| O           | -0.063299      | 1.559209       | 1.732250       | C           | -0.680943      | 4.661972       | 0.825829       |
| H           | -0.798279      | 2.004623       | 1.705703       | C           | -2.149662      | 4.738721       | 0.923669       |
| H           | -0.096258      | 1.151611       | 2.488423       | O           | 1.965235       | 0.165344       | 1.100688       |
| O           | 1.515094       | 1.466860       | -1.000948      | O           | 1.370851       | 1.191782       | -1.489083      |
| H           | 2.331088       | 1.404384       | -0.628465      | O           | -3.966302      | 0.479124       | -1.010766      |
| H           | 1.307920       | 2.331450       | -0.850261      | O           | -1.836170      | 0.143217       | 1.403296       |
| O           | -1.281087      | -1.036463      | -1.575821      | H           | -2.362094      | 0.758556       | 1.620858       |
| H           | -1.913982      | -0.691479      | -2.013373      | H           | -2.171646      | -0.551730      | 1.743473       |
| H           | -1.058099      | -1.707566      | -2.030890      | O           | -1.396286      | 1.131453       | -1.418010      |
| O           | -0.065022      | -2.084510      | 0.938004       | H           | -2.198186      | 1.125447       | -1.109723      |
| C           | -1.337610      | 2.941069       | -1.016085      | H           | -1.194610      | 1.967508       | -1.437114      |
| C           | -2.458836      | 3.900728       | -0.987662      | C           | -3.886534      | -0.766443      | -0.932568      |
| C           | -1.512264      | 4.993787       | -0.845282      | O           | 0.224929       | 5.508287       | 0.761703       |
| C           | -0.412571      | 4.055498       | -0.976013      | O           | 5.095512       | 0.669747       | 1.281087       |
| C           | 2.879678       | -1.011053      | 1.539423       | O           | 3.482760       | 3.550620       | -2.030276      |
| O           | -2.159393      | -0.154818      | 1.026219       | C           | 2.936361       | -0.568121      | 1.373420       |
| O           | -1.572906      | 6.226468       | -0.551967      | C           | 3.562528       | 2.305057       | -1.952078      |
| H           | -6.476697      | -2.682290      | 0.803279       | H           | 6.406841       | -2.035783      | 1.589207       |
| H           | 5.302753       | -3.801313      | 0.953736       | H           | -3.879409      | 5.319754       | 1.073436       |
| H           | 0.882180       | -6.120270      | -1.666489      | H           | 6.320867       | 0.575785       | -1.618464      |
| H           | -2.511819      | 6.495045       | -0.500293      | H           | -6.379092      | -2.805426      | -0.367724      |

**Table S8.** Calculated excitation energies of each  $m_J$  state. The active space for the CASSCF/NEVPT2 calculation is “12 electrons,7 orbitals (CAS(12,7))” and “15 electrons, 8 orbitals (CAS(15,8))” for the Tm (a) and Yb complexes (b), respectively, as explained in Figure S11. For Tm complexes, the tendency of energy levels obtained from CASSCF/NEVPT2 are comparable and the value of energy calculated with CASSCF are 10 - 20% smaller than NEVPT2 (c). We note that NEVPT2 cannot estimate the excitation energies of Yb complexes (d).

(a)

| CASSCF | Tm1                       | Tm2    |
|--------|---------------------------|--------|
| $m_J$  | Energy / $\text{cm}^{-1}$ |        |
| 6      | 0                         | 0      |
| -6     | 0.20                      | 0.37   |
| 5      | 131.32                    | 107.92 |
| -5     | 132.17                    | 108.19 |
| 4      | 190.76                    | 191.50 |
| -4     | 199.82                    | 197.61 |
| 0      | 234.11                    | 238.97 |
| 3      | 263.68                    | 263.31 |
| -3     | 266.81                    | 267.14 |
| 2      | 287.13                    | 305.81 |
| -2     | 294.61                    | 310.68 |
| 1      | 363.86                    | 337.24 |
| -1     | 364.03                    | 342.58 |

(b)

| CASSCF | Yb1                       | Yb2    |
|--------|---------------------------|--------|
| $m_J$  | Energy / $\text{cm}^{-1}$ |        |
| 7/2    | 0                         | 0      |
| -7/2   | 0                         | 0      |
| 5/2    | 170.09                    | 152.20 |
| -5/2   | 170.09                    | 152.20 |
| 3/2    | 236.45                    | 238.31 |
| -3/2   | 236.45                    | 238.31 |
| 1/2    | 333.16                    | 311.15 |
| -1/2   | 333.16                    | 311.15 |



(c)

| NEVPT2 | Tm1                       | Tm2    |
|--------|---------------------------|--------|
| $m_J$  | Energy / $\text{cm}^{-1}$ |        |
| 6      | 0                         | 0      |
| -6     | 0.22                      | 0.51   |
| 5      | 138.28                    | 135.09 |
| -5     | 140.42                    | 135.31 |
| 4      | 175.67                    | 185.39 |
| -4     | 189.73                    | 193.69 |
| 0      | 235.23                    | 249.42 |
| 3      | 269.56                    | 276.74 |
| -3     | 272.25                    | 289.90 |
| 2      | 301.51                    | 335.16 |
| -2     | 310.26                    | 341.89 |
| 1      | 424.16                    | 380.19 |
| -1     | 424.74                    | 384.86 |

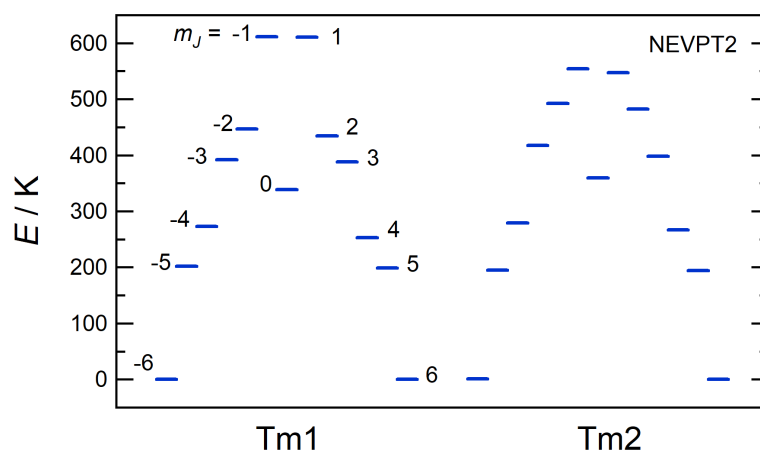

(d)

| NEVPT2 | Yb1                       | Yb2      |
|--------|---------------------------|----------|
| $m_J$  | Energy / $\text{cm}^{-1}$ |          |
| 7/2    | 0                         | 0        |
| -7/2   | 0                         | 0        |
| 5/2    | 47415.59                  | 52246.01 |
| -5/2   | 47415.59                  | 52246.01 |
| 3/2    | 47700.67                  | 52511.71 |
| -3/2   | 47700.67                  | 52511.71 |
| 1/2    | 47755                     | 52604.47 |
| -1/2   | 47755                     | 52604.47 |

**Table S9.** Calculated  $g$ -values of each Kramers Doublet (KD). The active spaces for the Tm and Yb complexes are (12,7) and (15,8), respectively, as explained in Figure S12. We note that the CASSCF result of  $m_J = \pm 7/2$  suggests that larger active space is necessary for the calculation of the higher KDs on the Yb complex (See Figure S12).

| KD            | Tm1 complex |          |          | Tm2 complex |          |          |
|---------------|-------------|----------|----------|-------------|----------|----------|
|               | $g_{xx}$    | $g_{yy}$ | $g_{zz}$ | $g_{xx}$    | $g_{yy}$ | $g_{zz}$ |
| $m_J = \pm 6$ | 0.00        | 0.00     | 13.86    | 0.00        | 0.00     | 13.85    |
| $\pm 5$       | 0.00        | 0.00     | 13.19    | 0.00        | 0.00     | 13.82    |
| $\pm 4$       | 0.00        | 0.00     | 10.12    | 0.00        | 0.00     | 10.82    |
| $\pm 3$       | 0.00        | 0.00     | 8.66     | 0.00        | 0.00     | 7.64     |
| $\pm 2$       | 0.00        | 0.00     | 5.17     | 0.00        | 0.00     | 2.25     |
| $\pm 1$       | 0.00        | 0.00     | 3.09     | 0.00        | 0.00     | 2.97     |

  

| KD              | Yb1 complex |          |          | Yb2 complex |          |          |
|-----------------|-------------|----------|----------|-------------|----------|----------|
|                 | $g_{xx}$    | $g_{yy}$ | $g_{zz}$ | $g_{xx}$    | $g_{yy}$ | $g_{zz}$ |
| $m_J = \pm 7/2$ | 0.45        | 0.53     | 7.14     | 0.08        | 0.24     | 7.05     |
| $\pm 5/2$       | 0.41        | 0.58     | 7.80     | 1.09        | 1.35     | 7.05     |
| $\pm 3/2$       | 1.24        | 2.33     | 4.22     | 0.64        | 1.28     | 4.67     |
| $\pm 1/2$       | 1.01        | 2.10     | 6.66     | 1.11        | 2.50     | 6.30     |

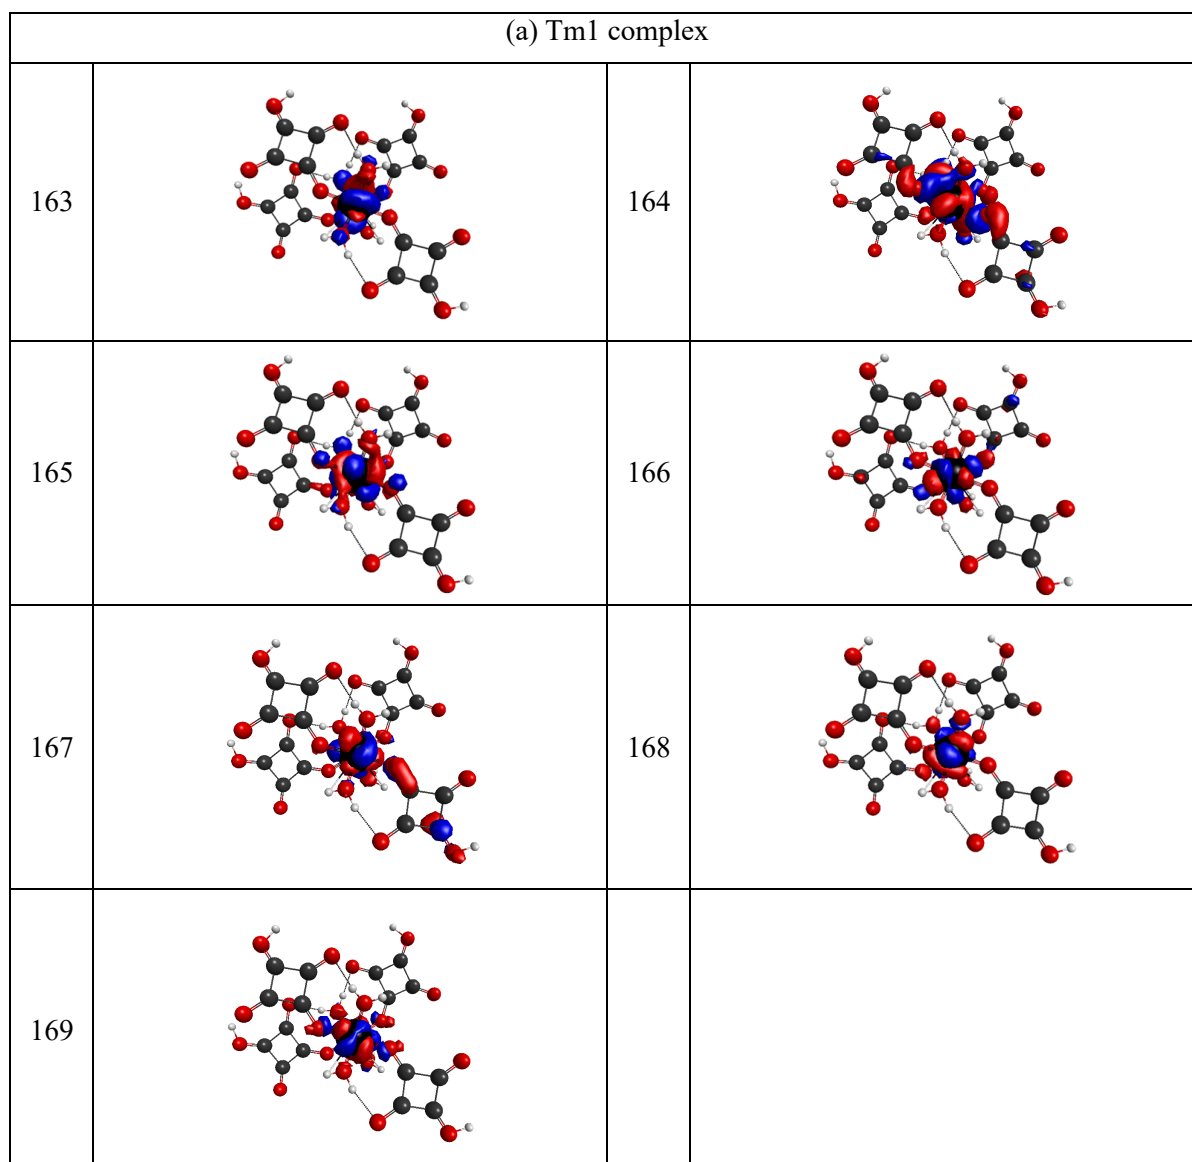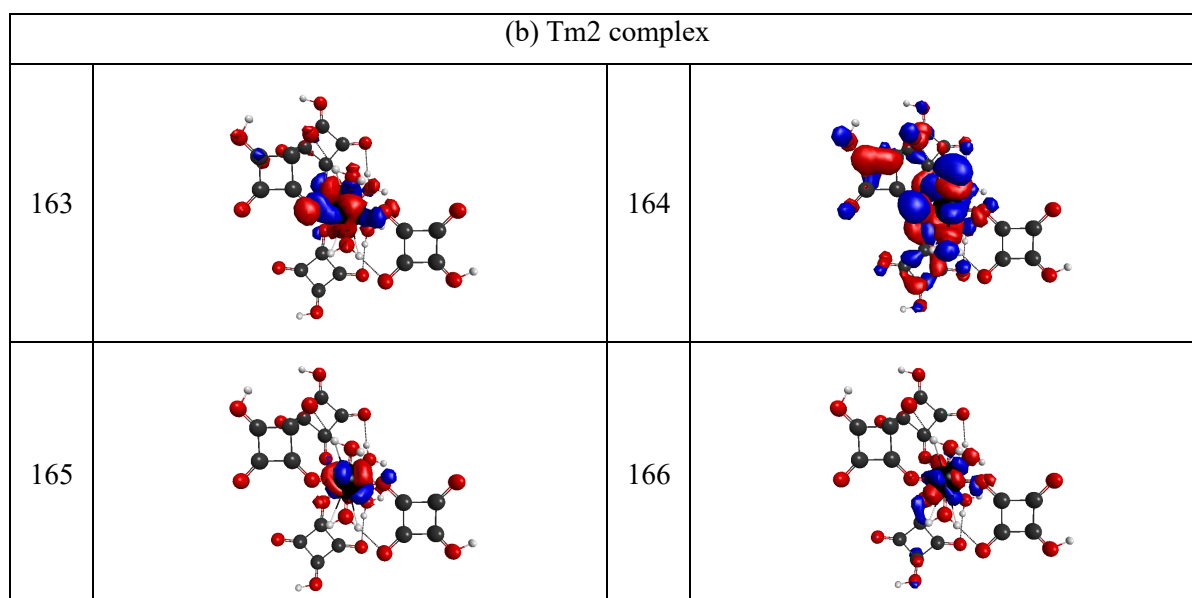

|     |                                                                                   |     |                                                                                     |
|-----|-----------------------------------------------------------------------------------|-----|-------------------------------------------------------------------------------------|
| 167 | 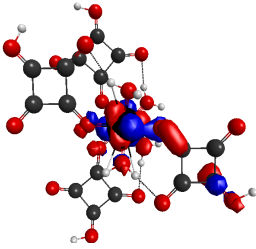 | 168 |  |
| 169 |  |     |                                                                                     |

| (c) Yb1 complex |                                                                                     |     |                                                                                       |
|-----------------|-------------------------------------------------------------------------------------|-----|---------------------------------------------------------------------------------------|
| 162             | 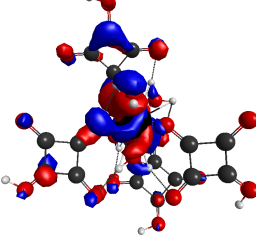  | 163 |   |
| 164             |  | 165 |  |
| 166             |  | 167 |  |
| 168             |  | 169 |  |

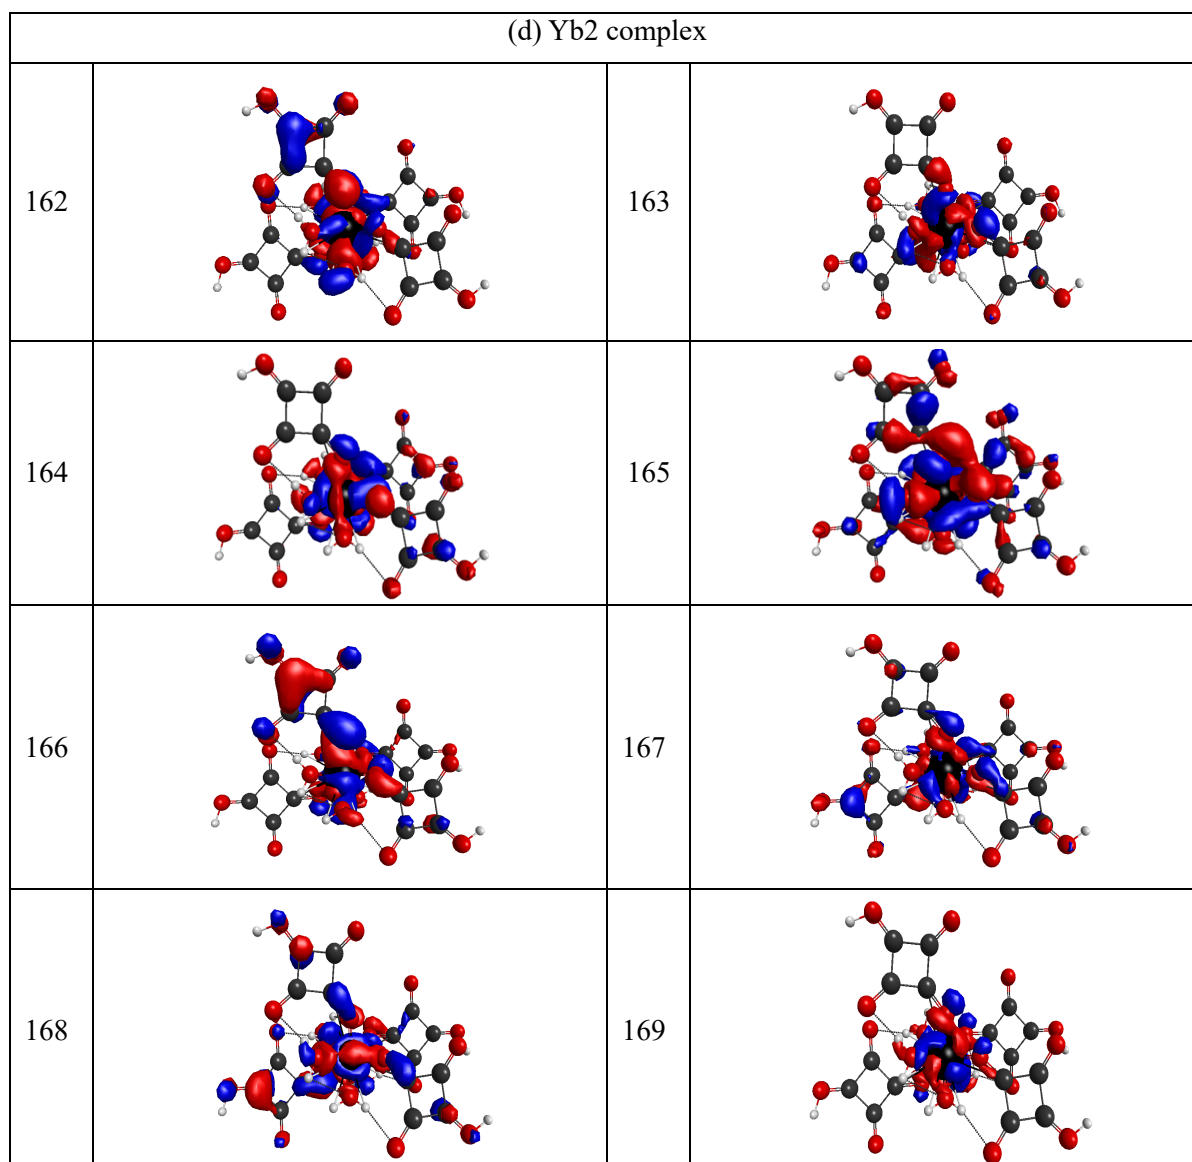

**Figure S12.** (a) Seven natural orbitals used for the CASSCF/NEVPT2 calculation of the Tm1 complex. (b) Seven natural orbitals used for the CASSCF/NEVPT2 calculation of the Tm2 complex. (c) Eight natural orbitals used for the CASSCF/NEVPT2 calculation of the Yb1 complex. Orbital #165 is strongly hybridized with ligand orbitals. (d) Eight natural orbitals used for the CASSCF/NEVPT2 calculation of the Yb2 complex. Orbital #165 is strongly hybridized with ligand orbitals.

## References

- (S1) R. Takano and T. Ishida, *Crystals*, 2021, **11**, 1221.
- (S2) M. Llunell, D. Casanova, J. Circra, J. M. Bofill, P. Almany, S. Alvarez, M. Pinsky and D. Avnir, *SHAPE*, version 2.1; University of Barcelona: Barcelona, Spain, and Hebrew University of Jerusalem: Jerusalem, Israel, 2005.
- (S3) J. J. Borrás-Almenar, J. M. Clemente-Juan, E. Coronado and B. S. Tsukerblat, *J. Comput. Chem.*, 2001, **22**, 985–991.
- (S4) K. A. Babeshkin, A. V. Gavrikov, S. P. Petrosyants, A. B. Ilyukhin, E. V. Belova and N. N. Efimov, *Eur. J. Inorg. Chem.*, 2020, **46**, 4380-4390.
- (S5) A. V. Gavrikov, N. N. Efimov, A. B. Ilyukhin, Z. V. Dobrokhotova and V. M. Novotortsev, *Dalton Trans.*, 2018, **47**, 6199-6209.
- (S6) A. V. Gavrikov, N. N. Efimov, Z. V. Dobrokhotova, A. B. Ilyukhin, P. N. Vasilyev and V. M. Novotortsev, *Dalton Trans.*, 2017, **46**, 11806-1181.
- (S7) S. P. Petrosyants, K. A. Babeshkin, A. V. Gavrikov, A. B. Ilyukhin, E. V. Belova and N. N. Efimov, *Dalton Trans.*, 2019, **48**, 12644-12655.
- (S8) O. Y. Mariichak, S. Kaabel, Y. A. Karpichev, G. M. Rozantsev, S. V. Radio, C. Pichon, H. Bolvin and J.-P. Sutter, *Magnetochem.*, 2020, **6**, 53.
- (S9) G. Peng, Y. Y. Zhang, B. Li, X. F. Sun, H. L. Cai, D. J. Li, Z. G. Gu, and G. E. Kostakis, *Dalton Trans.*, 2018, **47**, 17349-17356.
- (S10) G. J. Zhou, T. Han, Y. S. Ding, N. F. Chilton and Y. Z. Zheng, *Chem. Eur. J.*, 2017, **23**, 15617-15622.
- (S11) G. Brunet, R. Marin, M.-J. Monk, U. R. Genger, D. A. Galico, F. A. Sigoli, E. A. Suturina, E. Hemmer and M. Murugesu, *Chem. Sci.*, 2019, **10**, 6799-6808.
- (S12) J. R. Jiménez, I. F. Díaz-Ortega, E. Ruiz, D. Aravena, S. J. Pope, E. Colacio and J. M. Herrera, *Chem. Eur. J.*, 2016, **22**, 14548-14559.
- (S13) A. Lannes and D. Luneau, *Inorg. Chem.*, 2015, **54**, 6736-6743.
- (S14) A. Borah, S. Dey, S. K. Gupta, M. G. Walawalkar, G. Rajaraman and R. Murugavel, *Chem. Commun.*, 2020, **56**, 11879-11882.
- (S15) W. Zhao, H. Cui, X.-Y. Chen, G. Yi, L. Chen, A. Yuan and C.-L. Luo, *Dalton Trans.*, 2019, **48**, 5621-5626.
- (S16) P. Kalita, N. Ahmed, S. Moorthy, V. Béreau, A. Kumar Bar, P. Kumar, P. Nayak, J-P. Sutter, S. K. Singh and V. Chandrasekhar, *Dalton Trans.*, **2023**, 52, 2804-2815.
